1 **Evolution of copper resistance in the kiwifruit pathogen *Pseudomonas***  
2 ***syringae* pv. *actinidiae* through acquisition of integrative conjugative**  
3 **elements and plasmids**

4  
5 Elena Colombi<sup>1</sup>, Christina Straub<sup>1</sup>, Sven Künzel<sup>2</sup>, Matthew D. Templeton<sup>3,4</sup>,  
6 Honour C. McCann<sup>1,5\*</sup>, Paul B. Rainey<sup>1,2,6\*</sup>

7  
8 <sup>1</sup>New Zealand Institute for Advanced Study, Massey University, Auckland, New  
9 Zealand. <sup>2</sup>Max Planck Institute for Evolutionary Biology, Plön, Germany. <sup>3</sup>Plant  
10 and Food Research, Auckland, New Zealand. <sup>4</sup>School of Biological Sciences,  
11 University of Auckland, Auckland, New Zealand. <sup>5</sup>South China Botanical Institute,  
12 Chinese Academy of Sciences, Guangzhou, China. <sup>6</sup>Ecole Supérieure de Physique  
13 et de Chimie Industrielles de la Ville de Paris (ESPCI Paris-Tech), PSL Research  
14 University, Paris, France. \* Joint senior authors

15  
16 **Correspondence:** Elena Colombi, New Zealand Institute for Advanced Study,  
17 Massey University, Private Bag 102 904, Auckland 0745, New Zealand.  
18 Telephone: +64 9 4140800 ext 43810. e-mail: e.colombi@massey.ac.nz

19  
20 **Running title:** Evolution of copper resistance

21  
22 **ORIGINALITY-SIGNIFICANT STATEMENT**

23 Lateral gene transfer is a major evolutionary force, but its immediacy is often  
24 overlooked. Between 2008 and 2010 a single virulent clone of the kiwifruit  
25 pathogen *Pseudomonas syringae* pv. *actinidiae* spread to kiwifruit growing

26 regions of the world. After arrival in New Zealand it acquired genetic  
27 determinants of copper resistance in the form of integrative conjugative  
28 elements and plasmids. Components of these elements are evident in distantly  
29 related bacteria from millet (USA, 1921), kiwifruit (Japan, 1988) and wheat (New  
30 Zealand, 1968). Additional laboratory experiments capture evidence of the  
31 dynamism underpinning the evolution of these elements in real time and further  
32 emphasize the potent role that lateral gene transfer plays in microbial evolution.

33  
34 **SUMMARY**

35 Lateral gene transfer can precipitate rapid evolutionary change. In 2010 the  
36 global pandemic of kiwifruit canker disease caused by *Pseudomonas syringae* pv.  
37 *actinidiae* (*Psa*) reached New Zealand. At the time of introduction, the single  
38 clone responsible for the outbreak was sensitive to copper, however, analysis of  
39 a sample of isolates taken in 2015 and 2016 showed that a quarter were copper  
40 resistant. Genome sequences of seven strains showed that copper resistance –  
41 comprising *czc/cusABC* and *copABCD* systems – along with resistance to arsenic  
42 and cadmium, was acquired via uptake of integrative conjugative elements  
43 (ICEs), but also plasmids. Comparative analysis showed ICEs to have a mosaic  
44 structure, with one being a tripartite arrangement of two different ICEs and a  
45 plasmid that were isolated in 1921 (USA), 1968 (NZ) and 1988 (Japan), from *P.*  
46 *syringae* pathogens of millet, wheat and kiwifruit, respectively. Two of the *Psa*  
47 ICEs were nearly identical to two ICEs isolated from kiwifruit leaf colonists prior  
48 to the introduction of *Psa* into NZ. Additionally, we show ICE transfer *in vitro* and  
49 *in planta*, analyze fitness consequences of ICE carriage, capture the *de novo*  
50 formation of novel recombinant ICEs, and explore ICE host-range.

51

## 52 **INTRODUCTION**

53           Horizontal gene transfer (HGT) is a potent evolutionary process that  
54 significantly shapes patterns of diversity in bacterial populations. Horizontally  
55 transmissible elements, including plasmids, phages and integrative conjugative  
56 elements (ICEs) move genes over broad phylogenetic distances and mediate  
57 abrupt changes in niche preferences (Sullivan and Ronson, 1998; Ochman *et al.*,  
58 2000; Ochman *et al.*, 2005; Guglielmini *et al.*, 2011).

59           ICEs are plasmid-like entities with attributes of temperate phages that  
60 disseminate vertically as part of the bacterial chromosome and horizontally by  
61 virtue of endogenously encoded machinery for conjugative transfer (Wozniak  
62 and Waldor, 2010; Guglielmini *et al.*, 2011). Essential genetic modules include  
63 those mediating integration, excision, conjugation and regulation of conjugative  
64 activity (Mohd-Zain *et al.*, 2004; Juhas *et al.*, 2007; Roberts and Mullany, 2009).  
65 During the process of conjugation ICEs circularize and transfer to new hosts,  
66 leaving a copy in the original host genome (Wozniak and Waldor, 2010; Johnson  
67 and Grossman, 2015). Conjugation during pathogenesis is often regulated by  
68 environmental signals (Lovell *et al.*, 2009; Quiroz *et al.*, 2011; Vanga *et al.*, 2015).

69           In addition to a set of essential genes, ICEs often harbour “cargo” genes of  
70 adaptive significance to their hosts. These include genes affecting biofilm  
71 formation, pathogenicity, antibiotic and heavy metal resistance, symbiosis and  
72 bacteriocin synthesis (Peters *et al.*, 1991; Rauch *et al.*, 1992; Ravatn *et al.*, 1998;  
73 Beaber *et al.*, 2002; Drenkard *et al.*, 2002; Burrus *et al.*, 2006; Ramsay *et al.*,  
74 2006; Dimopoulou *et al.*, 2007; Kung *et al.*, 2010). The genetic information stored  
75 in cargo genes varies considerably causing ICEs to range in size from 20 kb to

76 500 kb (Johnson and Grossman, 2015).

77 In 2008 a distinct and particularly virulent form of the kiwifruit pathogen  
78 *Pseudomonas syringae* pv. *actinidiae* (*Psa*) was identified in Italy. It was  
79 subsequently disseminated throughout kiwifruit growing regions of the world  
80 causing a global pandemic that reached New Zealand (NZ) in 2010 (Balestra *et*  
81 *al.*, 2010; Abelleira *et al.*, 2011; Everett *et al.*, 2011; Vanneste *et al.*, 2011).

82 Genomic analysis showed that although the pandemic was derived from a single  
83 clone it acquired a set of distinctive ICEs during the course of its global journey  
84 (Mazzaglia *et al.*, 2012; Butler *et al.*, 2013; McCann *et al.*, 2013). The NZ lineage  
85 carries *Psa*<sub>NZ13</sub>ICE\_eno which harbours a 20 kb “enolase” region that is also  
86 found in otherwise divergent *Psa* ICEs (McCann *et al.*, 2013; McCann *et al.*, 2016).

87 Copper sprays have long been used in NZ to protect plants from a range of  
88 diseases. Since the arrival *Psa* in NZ kiwifruit orchardists have employed copper  
89 based products to protect vines. From 2011 an ongoing industry-based  
90 programme has been in place to monitor copper resistance. In 2014 evidence  
91 was first obtained of *Psa* isolates resistant to copper sulphate. Given that the  
92 clone of *Psa* originally introduced into NZ was sensitive to copper and lacked  
93 genes encoding copper resistance (McCann *et al.*, 2013), detection of copper  
94 resistance raised the possibility that the evolution of copper resistance in *Psa* is  
95 an evolutionary response to the use of copper-based sprays.

96 Here we report the phenotypic and genetic basis of copper resistance in  
97 NZ isolates of *Psa* and show that its emergence has been fuelled by lateral gene  
98 transfer involving ICEs and plasmids. We additionally describe the mosaic  
99 structure of ICEs, show the dynamics of ICE transfer both *in vitro* and *in planta*,

100 analyze fitness consequences of ICE carriage, capture the *de novo* formation of  
101 novel recombinant ICEs, and explore ICE host-range.

102

## 103 **RESULTS**

### 104 **Occurrence of copper resistance in *Psa***

105 *Psa* NZ13, isolated in 2010 and representative of the clone introduced in  
106 New Zealand, lacks genes encoding copper resistance (McCann *et al.*, 2013) and  
107 is unable to grow at copper concentrations in excess of 0.8 mM CuSO<sub>4</sub>. Prior to  
108 2014 no copper resistant or tolerant strains had been reported. However, in  
109 2014, two strains isolated from two different kiwifruit orchards, *Psa* NZ45 and  
110 *Psa* NZ47, displayed copper resistance, with a MIC of 1.2 mM CuSO<sub>4</sub>. This finding  
111 prompted a small-scale sampling of both copper treated and untreated orchards  
112 in 2015/2016 encompassing the area where resistance was first identified. From  
113 a sample of 213 strains isolated from seven orchards 59 were found to be copper  
114 resistant. Copper resistant isolates were sampled from both copper treated and  
115 untreated orchards. Additional copper resistant strains were procured from  
116 other kiwifruit-growing regions of New Zealand (Figure S1).

117

### 118 **ICE and plasmid-mediated acquisition of copper resistance in *Psa***

119 The genome of the focal copper resistant isolate, *Psa* NZ45, is a direct  
120 clonal descendant of the isolate originally introduced into NZ (*Psa* NZ13)  
121 (McCann *et al.*, 2016), but differs in two significant regards. Firstly, the “native”  
122 ICE (*Psa*<sub>NZ13</sub>ICE\_eno) at *att*-1 (immediately upstream of *clpB*), is located at the  
123 second *att* site (*att*-2) immediately downstream of *queC* (Figure 1). Secondly, the

124 genome harbours a new 107 kb ICE (*Psa*<sub>NZ45</sub>ICE\_Cu) integrated at the *att-1* site:  
125 *Psa*<sub>NZ45</sub>ICE\_Cu carries genes encoding copper resistance (Figures 1 and 2A).  
126 The genomes of six additional copper resistant *Psa* isolates were also  
127 sequenced (Table 1) and as with *Psa* NZ45, reads were aligned against the *Psa*  
128 NZ13 reference genome (McCann *et al.*, 2013; Templeton *et al.*, 2015). All six  
129 harbour mobile elements carrying genes encoding copper resistance. The  
130 diversity of these elements and genomic location is shown in Figure 1 and their  
131 structure is represented in Figure 2A. All isolates are direct clonal descendants of  
132 *Psa* NZ13 and thus share an almost identical genome with the exception of the  
133 determinants of copper resistance. In *Psa* NZ47 the genes encoding copper  
134 resistance are located on a 90 kb ICE (*Psa*<sub>NZ47</sub>ICE\_Cu) integrated at the *att-1* site:  
135 the native *Psa*<sub>NZ13</sub>ICE\_eno is located at the *att-2* site. *Psa* NZ62 carries an ICE  
136 identical to that found in *Psa*<sub>NZ47</sub>ICE\_Cu (*Psa*<sub>NZ62</sub>ICE\_Cu), but is integrated at the  
137 *att-2* site; the native ICE (*Psa*<sub>NZ13</sub>ICE\_eno) is absent leaving the *att-1* site  
138 unoccupied. Isolate *Psa* NZ63 carries *Psa*<sub>NZ45</sub>ICE\_Cu integrated at the *att-1* site,  
139 but as in *Psa* NZ62, the native *Psa*<sub>NZ13</sub>ICE\_eno has been lost. Copper resistance  
140 genes in isolate *Psa* NZ64 are also ICE-encoded, but the NZ64 ICE  
141 (*Psa*<sub>NZ64</sub>ICE\_Cu) is genetically distinct from both *Psa*<sub>NZ47</sub>ICE\_Cu and  
142 *Psa*<sub>NZ45</sub>ICE\_Cu – at 130 kb, it is also the largest. In NZ64, *Psa*<sub>NZ64</sub>ICE\_Cu is located  
143 at the *att-1* site and the *att-2* site contains the native (*Psa*<sub>NZ13</sub>ICE\_eno) ICE.  
144 Isolates *Psa* NZ65 and NZ66 both harbour copper resistance genes on a near  
145 identical, 120 kb previously undescribed plasmid (p*Psa*<sub>NZ65</sub> and p*Psa*<sub>NZ66</sub>,  
146 respectively). The only significant difference among the plasmids is the location  
147 of a streptomycin resistance-encoding transposon (see below): both isolates have  
148 the original *Psa*<sub>NZ13</sub>ICE\_eno integrated at the *att-2* site (Figure 1). *Psa* harbouring

149 copper resistance-encoding ICEs have a MIC CuSO<sub>4</sub> of 1.2 mM while the MIC of  
150 plasmid-carrying *Psa* 1.5 mM (Table 1).

151 That such a small sample of isolates is each unique with regard to the  
152 copper resistance-encoding element points to highly dynamic processes shaping  
153 their evolution. Such dynamism has been previously noted among enolase-  
154 encoding ICEs obtained from a global collection of epidemic *Psa* isolates  
155 (McCann *et al.*, 2013) and has been observed elsewhere (Burrus *et al.*, 2006,  
156 Wozniak and Waldorf, 2010). In this study our samples came from a relatively  
157 small geographical location. Two ICEs, *Psa*<sub>NZ64</sub>ICE\_Cu and *Psa*<sub>NZ47</sub>ICE\_Cu were  
158 found in different isolates sampled from the same orchard (one year apart),  
159 although the two isolates containing near identical plasmids were isolated from  
160 orchards located 100 km apart. Two isolates sampled one year apart from the  
161 same location (neighboring orchards in Te Puke) carry the same ICE  
162 (*Psa*<sub>NZ45</sub>ICE\_Cu=*Psa*<sub>NZ63</sub>ICE\_Cu; *Psa*<sub>NZ47</sub>ICE\_Cu=*Psa*<sub>NZ62</sub>ICE\_Cu) (Table 1).

163 The dynamics of ICE evolution becomes especially evident when placed in  
164 the broader context possible by comparisons to ICEs recorded in DNA databases.  
165 The core genes of the copper resistance-encoding ICEs from New Zealand *Psa*  
166 isolates are syntenous with the core genes of the family of ICEs that includes  
167 PPHGI-1 (isolated in 1984 from bean in Ethiopia (Teverson, 1991; Pitman *et al.*,  
168 2005) and the three ICEs previously described from *Psa* found in New Zealand  
169 (2010), Italy (2008) and China (2010) (McCann *et al.*, 2013; Butler *et al.*, 2013; E.  
170 Colombi, unpublished). *Psa*<sub>NZ45</sub>ICE\_Cu is a mosaic of DNA from two known ICEs  
171 and a plasmid. It shares regions of near perfect identity (over 66 kb) with ICEs  
172 present in the otherwise divergent host genomes of *P. syringae* *pv.* *panici* (*Ppa*,  
173 LGM2367) isolated from proso millet in Madison (USA) in the 1920s (over the

174 first 38 kb it differs by just 12 SNPs, and one 144 bp insertion), *P. syringae* pv.  
175 *atrofasciens* (*Paf*, ICMP4394) isolated in NZ in 1968 from wheat, and a 70.5 kb  
176 plasmid present in a non-pandemic *Psa* strain (J2), isolated in Japan in 1988  
177 (Figure 2B).

178 Interestingly, two of the ICEs described here have also been found in non-  
179 *Psa Pseudomonas* isolated from kiwifruit leaves. *Psa*<sub>NZ47</sub>ICE\_Cu shows 99.7%  
180 pairwise nucleotide identity with an ICE found in *P. marginalis* ICMP 11289  
181 isolated in 1991 from *A. deliciosa* in Katikati (New Zealand). *Psa*<sub>NZ64</sub>ICE\_Cu is  
182 almost identical (99.5% nucleotide pairwise identity) to an ICE from *P. syringae*  
183 pv. *actinidifoliorum* (*Pfm*) ICMP19497, isolated from kiwifruit in 2010 in Te Puke  
184 (New Zealand) (Visnovsky *et al.*, 2016) (Table 1). Additionally, a 48 kb segment  
185 of coding copper resistance genes *Psa*<sub>NZ64</sub>ICE\_Cu shares 99.3% nucleotide  
186 pairwise identity with a locus found in *P. azotoformans* strain S4 (Fang *et al.*,  
187 2016), which was isolated from soil in 2014 in Lijiang (China). However, the  
188 locus from *P. azotoformans* is not associated with an ICE.

189

## 190 **Genetic determinants of copper resistance**

191 Copper resistance is typically conferred by operons encoding either  
192 copper efflux (*cusABC*) and / or sequestration (*copABCD*) systems, both of which  
193 can be under the regulation of the *copRS* / *cusRS* two-component regulatory  
194 system (Bondarczuk and Piotrowska-Seget, 2013). ICEs identified in *Psa* isolates  
195 harbour operons encoding examples of both resistance mechanisms (and  
196 regulators), plus genetic determinants of resistance to other metal ions. In each  
197 instance the resistance genes are located within “variable regions” (VR) of ICEs  
198 into which cargo genes preferentially integrate (Figure 2A). Delineation of these



199 variable regions comes from detailed analysis of 32 unique ICEs from the *Pph*  
200 1302A and *Psa* families that will be published elsewhere (E. Colombi,  
201 unpublished). Overall there are notable similarities and differences in the  
202 organization of the variable regions.

203 As shown in Figure 2B, the first 38 kb of *Psa*<sub>NZ45</sub>ICE\_Cu is almost identical  
204 (99.7% identical at the nucleotide level) to *Ppa*<sub>LGM2367</sub>ICE. This region spans the  
205 core genes, but extends ~8.2 kb into the variable cargo genes with just two SNPs  
206 distinguishing the two ICEs (across the 8.2 kb variable region). Encoded within  
207 this region is an integrase, arsenic resistance genes (*arsRBCH*), a gene implicated  
208 in cadmium and cobalt resistance (*czcD*) and the *copRS* regulatory system.  
209 Partway through *copS* the two ICEs diverge at a recombination breakpoint with  
210 the downstream variable region from *Psa*<sub>NZ45</sub>ICE\_Cu being homologous to a set of  
211 copper resistance genes found on plasmid pPaCu1 from the divergent (non-  
212 pandemic) Japanese isolate of *Psa* (J2) (Nakajima *et al.*, 2002). This region  
213 comprises a putative copper transporting ATPase encoded by *copG* (Gutiérrez-  
214 Barranquero *et al.*, 2013), *cusABC* genes involved in the detoxification of  
215 monovalent cations, including copper and silver (Mergeay *et al.*, 2003; Rensing  
216 and Grass, 2003) and *copABCD* (Figure 2B). The last 4 kb of the variable region of  
217 *Psa*<sub>NZ45</sub>ICE\_Cu shares almost complete identity with *Ppa*<sub>LGM2367</sub>ICE (Figure 2B).

218 Detail of the diversity of copper resistance (and related metal resistance)  
219 genes is shown in Figure 3. All elements (ICEs and plasmids) harbour the *copRS*  
220 regulatory system and, with the exception of *Psa*<sub>NZ47</sub>ICE\_Cu, all carry both *cusABC*  
221 and *copABCD*, although their organization varies. For example, while *copABCD* is  
222 typical, in *Psa*<sub>NZ64</sub>ICE\_Cu *copAB* and *copCD* are organized as two separate  
223 operons (Figure 3). The putative copper ABC transport system encoded by *copG*

224 is a common feature, and determinants of arsenic resistance are present in both  
225 *Psa<sub>NZ45</sub>ICE\_Cu* and *Psa<sub>NZ64</sub>ICE\_Cu*. The putative cadmium and related metal  
226 resistance gene, *czcD* is also present on these two ICEs. As noted above, a  
227 transposon carrying determinants of streptomycin resistance (*strAB*) is present  
228 on plasmids pPsaNZ65 and pPsaNZ66. The transposon is of the Tn3 family and  
229 the cassette bears identity to streptomycin resistance carrying transposons  
230 found in *P. syringae* pv. *syringae* B728a (Feil *et al.*, 2005), but also on plasmid  
231 pMRVIM0713 from *Pseudomonas aeruginosa* strain MRSN17623 (GenBank:  
232 KP975076.1), plasmid pPMK1-C from *Klebsiella pneumoniae* strain PMK1  
233 (Stoesser *et al.*, 2014), and plasmid pTi carried by *Agrobacterium tumefaciens*  
234 LBA4213 (Ach5) (GenBank: CP007228.1).

235         At the level of the operons determining copper resistance there is marked  
236 genetic diversity, however, with the exception of CopR, there is relatively little  
237 evidence of within operon recombination. The CusABC system is carried on  
238 pPsaNZ65 and pPsaNZ66 (but these are identical) and the ICEs *Psa<sub>NZ45</sub>ICE\_Cu*  
239 and *Psa<sub>NZ64</sub>ICE\_Cu*: CusA, CusB and CusC show 75.8%, 50.0% and 44.8% pairwise  
240 amino acid identity, respectively; phylogenetic trees based on protein sequences  
241 show congruence (Figure S2). The CopABCD system is present on *Psa<sub>NZ45</sub>ICE\_Cu*,  
242 *Psa<sub>NZ47</sub>ICE\_Cu*, *Psa<sub>NZ64</sub>ICE\_Cu* (but CopAB and CopCD are in different locations  
243 (Figure 3)) and plasmid pPsaNZ65 (and pPsaNZ66): CopA, CopB, CopC and CopD  
244 show 76.4%, 63.1%, 79.1% and 60.8% pairwise amino acid identity,  
245 respectively. With the exception of CopC (where bootstrap support is low)  
246 phylogenetic trees for each protein show the same overall arrangement (Figure  
247 S3). The two component regulatory system *copRS* is also present on each of the  
248 elements with the amino acid sequences of CopR showing 84.3% and those of

249 CopS 63.0% pairwise amino acid identity. Phylogenetic trees show CopS from  
250 *Psa*<sub>NZ64</sub>ICE\_Cu to be the most divergent, and those from *Psa*<sub>NZ45</sub>ICE\_Cu and  
251 *Psa*<sub>NZ47</sub>ICE\_Cu being most similar: CopR shows the same phylogenetic  
252 arrangement, however, CopR sequences from *Psa*<sub>NZ45</sub>ICE\_Cu and *Psa*<sub>NZ47</sub>ICE\_Cu  
253 are identical at the protein level suggesting a recent recombination event (Figure  
254 S4).

255

256 ***Psa*<sub>NZ45</sub>ICE\_Cu imposes no detectable fitness cost and confers a selective**  
257 **advantage *in vitro* in the presence of copper**

258 To determine whether ICE carriage confers a fitness cost, we took  
259 advantage of the fact that *Psa* NZ13 and *Psa* NZ45 are essentially isogenic, with  
260 the exception of the additional ICE in *Psa* NZ45 (*Psa*<sub>NZ45</sub>ICE\_Cu). Each strain was  
261 grown alone and density of cells monitored over a 72 hour period with samples  
262 taken every 24 hours. In the absence of copper sulphate, no difference in cell  
263 density was detected; however, in the presence of 0.5 and 0.8 mM CuSO<sub>4</sub> the  
264 density of *Psa* NZ13 was reduced (Figure 4A). There is thus no apparent fitness  
265 cost associated with carriage of *Psa*<sub>NZ45</sub>ICE\_Cu in the absence of copper sulphate,  
266 but there is a fitness advantage in copper-containing environments.

267 Although carriage of *Psa*<sub>NZ45</sub>ICE\_Cu appeared not to affect the growth of  
268 *Psa* NZ45 in the absence of copper, a more precise measure of fitness was sought  
269 by performing competition experiments in which *Psa* NZ13 and *Psa* NZ45 were  
270 co-cultured. For this experiment *Psa* NZ13 was marked with a kanamycin  
271 resistance cassette so that it could be distinguished from kanamycin sensitive,  
272 copper resistant *Psa* NZ45. Over a 24 hour period where the two strains  
273 (founded at equal density) competed for the same resources (in shaken MGY

274 medium without copper sulphate), the fitness of *Psa* NZ45 was not significantly  
275 different to *Psa* NZ13 ( $1.07 \pm 0.04$ ; mean and SEM from 3 independent  
276 experiments, each comprised of 3 replicates), indicating no significant detectable  
277 cost of carriage of *Psa*<sub>NZ45</sub>ICE\_Cu.

278         Given that the mechanism of copper resistance in *Psa* NZ45 – based upon  
279 *copABCD* – likely involves sequestration of copper ions we considered the  
280 possibility that this isolate might confer cross protection to non-copper resistant  
281 isolates, such as *Psa* NZ13. To this end we performed co-culture experiments at  
282 sub-inhibitory and inhibitory copper sulphate concentrations. Growth of *Psa*  
283 NZ13 at sub-inhibitory concentrations of copper sulphate was significantly  
284 impaired by the presence of *Psa* NZ45 and this was especially evident at 48 and  
285 72 hours (Figure S5). At the inhibitory copper sulphate concentration, *Psa* NZ13  
286 appeared to benefit from the presence of *Psa* NZ45. Again, this was most evident  
287 at 48 and 72 hours (Figure S5).

288

289 ***Psa*<sub>NZ45</sub>ICE\_Cu imposes no detectable fitness cost and confers no selective**  
290 **advantage *in planta***

291         Cost and benefit of carrying *Psa*<sub>NZ45</sub>ICE\_Cu was also evaluated during  
292 endophytic colonization of kiwifruit leaves. No significant difference was  
293 observed in growth of singly-inoculated *Psa* NZ13 and NZ45 (dip inoculation was  
294 used to found colonization). Spray application of a commonly used commercial  
295 copper-based treatment (Nordox75 (0.375 g L<sup>-1</sup>)) subsequent to dip inoculation  
296 resulted in a reduction of bacterial density of both strains and the presence of  
297 *Psa*<sub>NZ45</sub>ICE\_Cu in *Psa* NZ45 did not confer any advantage *in planta* (Figure 4B).  
298 Co-cultivation competition assays in the presence or absence of Nordox75

299 confirmed carriage of *Psa*<sub>NZ45</sub>ICE\_Cu imposes no significant fitness cost or  
300 advantage during endophytic growth: fitness of NZ45 relative to NZ13 was 1.00  
301  $\pm 0.02$  and  $1.07 \pm 0.03$  at day 3 and 7, respectively; fitness of NZ45 relative to  
302 NZ13 in the presence of  $0.375 \text{ g L}^{-1}$  Nordox was  $1.15 \pm 0.04$  and  $0.97 \pm 0.09$  at  
303 day 3 and 7, respectively (data are means and SEM from 3 independent  
304 experiments, each comprised of 5 replicates; significance was calculated by one  
305 sample *t*-test).

306

### 307 ***Psa*<sub>NZ45</sub>ICE\_Cu transfer dynamics *in vitro* and *in planta***

308 Acquisition of *Psa*<sub>NZ45</sub>ICE\_Cu (and related ICEs) by *Psa* NZ13 suggests that  
309 the element is active and capable of self-transmission. If so, then it is possible  
310 that transfer may have occurred during the course of the co-cultivation  
311 experiments used to determine cost of ICE carriage. To determine whether this  
312 had happened samples from the mixtures were plated on MGY medium  
313 containing both kanamycin and copper sulphate. Copper resistant, kanamycin  
314 resistant transconjugants were detected both *in vitro* and *in planta*. This means  
315 that a fraction of *Psa* NZ13 strains acquired *Psa*<sub>NZ45</sub>ICE\_Cu. These  
316 transconjugants marginally inflate the counts of *Psa* NZ45, however, the number  
317 of transconjugants (see below) was several orders of magnitude less than *Psa*  
318 NZ13, thus having no appreciable effect on the measures of relative fitness.

319 At 24 hours in shaken MGY broth transconjugants were present at a  
320 frequency of  $5.04 \pm 2.25 \times 10^{-3}$  per recipient cell (mean and SEM from 3  
321 independent experiments, each comprised of 3 replicates). Analysis of samples  
322 from *in planta* experiments showed that at 3 days, transconjugants were present  
323 at a frequency of  $2.05 \pm 0.63 \times 10^{-2}$  per recipient cell (mean and SEM from 3

324 independent experiments, each comprised of 5 replicates). On plants in the  
325 presence of Nordox ( $0.375 \text{ g L}^{-1}$ ) the frequency of transconjugants was  $9.37 \pm$   
326  $1.56 \times 10^{-2}$  per recipient three days after inoculation (mean and SEM from 3  
327 independent experiments, each comprised of 5 replicates). Transfer was also  
328 observed in M9 agar, on M9 agar supplemented with  $0.5 \text{ mM CuSO}_4$ , on M9 agar  
329 supplemented with a macerate of Hort16A fruit with transconjugants present (at  
330 48 hours) at a frequency of  $2.16 \pm 0.9 \times 10^{-5}$ ,  $1.11 \pm 0.4 \times 10^{-5}$  and  $1.98 \pm 0.8 \times 10^{-5}$   
331 per recipient cell, respectively.

332 To explore the dynamics of transfer *in vitro*, samples from shaken MGY  
333 cultures were taken hourly, for six hours, and then at 24 hours. The data,  
334 presented in Figure 5, show acquisition of *Psa*<sub>NZ45</sub>ICE\_Cu by *Psa* NZ13 within one  
335 hour of the mating mix being established (approximately 1 recipient per  $10^5$   
336 recipient cells). The frequency was relatively invariant over the subsequent six  
337 hour period, but rose to approximately 1 recipient in  $10^3$  cells at 24 hours.

338 Detection of ICE transfer just one hour after mixing donor and recipient  
339 cells promoted a further experiment in which transconjugants were assayed at  
340 10 minute intervals. From three independent experiments, each with five  
341 replicates, transconjugants were detected at 30 mins (approximately  $4 \times 10^{-7}$   
342 transconjugants per recipient cell).

343 Analysis of co-cultivation experiments from kiwifruit leaves showed  
344 evidence that *Psa*<sub>NZ45</sub>ICE\_Cu also transferred *in planta*. The frequency of  
345 transconjugants at day 3 and day 7 was approximately 1 per 50 recipient cells  
346 and the frequency of transconjugants was not affected by changes in the initial  
347 founding ratios of donor and recipient cells (Table S1). Overall, the frequency of

348 transconjugants was approximately three orders of magnitude greater *in planta*  
349 than *in vitro*.

350

### 351 **ICE displacement and recombination**

352 To check the genetic composition of transconjugants and to investigate  
353 whether *Psa*<sub>NZ45</sub>ICE\_Cu integration in recipient cells occurred at the *att-1* or *att-2*  
354 site, a set of primers were designed to identify the location of ICE integration in  
355 the *Psa* NZ13 genome (Table S2). 11 independently generated transconjugants  
356 from shaken MGY culture were screened. As expected, successful amplification of  
357 primers annealing to *copABCD* in *Psa*<sub>NZ45</sub>ICE\_Cu was observed in all  
358 transconjugants, while amplification of the *enolase* gene primers (indicative of  
359 the presence of the native *Psa*<sub>NZ13</sub>ICE\_eno) occurred only in *Psa* NZ13 and *Psa*  
360 NZ45 (Figure S6). However, in two transconjugants only the *IntPsaNZ13-att-1*  
361 primer pair resulted in amplification, suggesting that recombination between  
362 *Psa*<sub>NZ45</sub>ICE\_Cu and *Psa*<sub>NZ13</sub>ICE\_eno had occurred (Figure S7). Genome sequencing  
363 of one of these transconjugants revealed a recombination event inside the  
364 variable region of the ICE that produced a chimeric ICE identical to *Psa*<sub>NZ45</sub>ICE\_Cu  
365 up to and including the CuR operon, with the remainder identical to the  
366 downstream segment of *Psa*<sub>NZ13</sub>ICE\_eno (Figure 6).

367

### 368 ***Psa*<sub>NZ45</sub>ICE\_Cu can be transferred to a range of *P. syringae* strains**

369 The host range of the *Psa*<sub>NZ45</sub>ICE\_Cu was characterised using a panel of  
370 nine different *Pseudomonas* strains as recipients, representing the diversity of *P.*  
371 *syringae* and the genus more broadly. Transfer of *Psa*<sub>NZ45</sub>ICE\_Cu to *Psa* J31, *Pfm*  
372 NZ9 and *P. syringae* pv. *phaseolicola* (*Pph*) 1448a (on M9 agar plates) was

373 observed with the frequency of transconjugants per recipient cell being  $7.64 \pm$   
374  $1.7 \times 10^{-6}$ ,  $7.74 \pm 2.5 \times 10^{-7}$  and  $1.23 \pm 0.2 \times 10^{-4}$ , respectively. No transconjugants  
375 were detected for *P. aeruginosa* PAO1, *P. fluorescens* SBW25, *P. syringae* pv.  
376 *tomato* DC3000 or *Psa* K28, despite the fact that these three strains have both *att*  
377 sites.

378

## 379 **DISCUSSION**

380 The importance and impact of lateral gene transfer on the evolution of  
381 microbial populations has long been recognized (Sullivan *et al.*, 1995; Lilley and  
382 Bailey, 1997; Ochman *et al.*, 2000; Ochman *et al.*, 2005; Wozniak and Waldor,  
383 2010; Polz *et al.*, 2013). Here we have captured the real time evolution of copper  
384 resistance in a plant pathogen, in an agricultural setting, and shown that  
385 movement of copper resistance genes occurs primarily via ICEs. The strains  
386 subject to genomic analysis provide a glimpse of just how dynamic evolution  
387 fuelled by ICEs can be. Of the seven copper resistant *Psa* isolates analyzed, five  
388 contain copper resistance-encoding ICEs – three unique ICEs in total – with  
389 variable placement within the *Psa* genome, including movement and instability  
390 of the native ICE (*Psa*<sub>NZ13</sub>ICE\_eno). Further evidence of dynamism comes from *in*  
391 *vitro* and *in planta* studies, which show not only transfer to isogenic *Psa* and  
392 unrelated *P. syringae* strains, but also the ready formation of chimeras between  
393 *Psa*<sub>NZ45</sub>ICE\_Cu and *Psa*<sub>NZ13</sub>ICE\_eno. Mosaicism of ICEs has been reported  
394 elsewhere and is often promoted by the presence of tandem copies (Garriss *et al.*,  
395 2009; Wozniak and Waldor, 2010). The ease with which ICEs move between  
396 strains and capacity for intra-ICE recombination emphasizes the futility of  
397 drawing conclusions on strain phylogeny based on ICE phylogeny (McCann *et al.*,



398 2013), but also the impossibility of understanding ICE evolution based on the  
399 phylogeny of ICEs themselves.

400 Evidence of the formation of chimeric ICEs extends beyond the ICEs  
401 studied here. *Psa*<sub>NZ45</sub>ICE\_Cu is a recombinant of two previously reported ICEs  
402 and a plasmid: most surprising is the fact that the recombinant components are  
403 derived from elements isolated from three geographic regions (USA, Japan and  
404 New Zealand) from three different plants (millet, kiwifruit and wheat) and  
405 spanning almost 100 years. Additionally, two of the copper resistance-encoding  
406 ICEs found in *Psa* (*Psa*<sub>NZ47</sub>ICE\_Cu and *Psa*<sub>NZ64</sub>ICE\_Cu) have been reported in other  
407 kiwifruit leaf colonizing organisms emphasizing the ease by which self-  
408 transmissible elements can move between members of a single community.  
409 Clearly the potency of evolution fuelled by ICEs with the *P. syringae* complex is  
410 remarkable, with impacts likely extending well beyond that inferred from the  
411 analysis of genome sequences (Fondi *et al.*, 2016).

412 Evidence of the spectrum and dynamic of transfer inferred from the  
413 genomic analysis of natural isolates is bolstered by demonstration of the *in vitro*  
414 and *in planta* transfer of *Psa*<sub>NZ45</sub>ICE\_Cu. The fact that *Psa*<sub>NZ45</sub>ICE\_Cu can be  
415 detected in a recipient strain just 30 minutes after mixing with a donor strain (in  
416 shaken broth culture) points to an as yet undetermined proficiency for transfer  
417 and possible regulatory mechanism. At the same time, the frequency of  
418 transconjugants *in planta* are several orders of magnitude greater than *in vitro*  
419 suggesting even greater potential (perhaps regulated) for transfer in the natural  
420 environment.

421 The selective causes underpinning the evolution of copper resistance in  
422 *Psa* is uncertain and to date copper resistance is not known to have evolved

423 outside of New Zealand. While it is tempting to blame use of copper sprays by  
424 orchardists, it is possible that the evolution of copper resistant *Psa* is a more  
425 general response to copper levels in New Zealand soils combined with long-term  
426 use of copper-based sprays in New Zealand agriculture (Morgan and Taylor,  
427 2004). Support for this stems from the fact that *Psa*<sub>NZ47</sub>ICE\_Cu shows almost  
428 perfect identity with an ICE found in *P. marginalis* (ICMP 11289) from kiwifruit  
429 isolated in 1991 (in New Zealand). In addition, copper resistance-encoding ICEs  
430 were found in both copper treated, and untreated orchards. There is need to  
431 understand further the population ecology of copper-resistance ICEs at regional,  
432 national and global scales and the selective causes for their maintenance and  
433 spread (Staehlin *et al.*, 2016).

434       The impact of the copper resistance-encoding ICEs on fitness *in planta* –  
435 in the presence of copper sprays – appears to be minimal. While this is  
436 heartening news from the perspective of control of the pathogen, there are at  
437 least three reasons to treat this result with caution. Firstly, it is difficult to  
438 accurately assess fitness *in planta* and it is possible that our measures  
439 underestimate the contribution of copper resistance to growth in the presence of  
440 copper: even a 1% increase in fitness over 24 hours, which is beyond  
441 experimental capacity to detect, can have significant long-term consequences.  
442 Secondly, the presence of copper resistance genes means opportunity for levels  
443 of resistance to increase through, for example, promoter mutations that increase  
444 levels of transcription of resistance determinants, or through acquisition of  
445 additional copper resistance-encoding genes. Thirdly, and perhaps most  
446 significantly, is the fact that the copper resistance-encoding ICEs confer no  
447 measurable fitness cost even in the absence of copper. This suggests that these

448 elements will not be readily lost from *Psa* populations even if copper-based  
449 sprays were eliminated (Andersson and Hughes, 2010; Neale *et al.*, 2016). That  
450 some strains of the global pandemic now contain two ICEs gives reason to  
451 suspect elevated evolutionary potential among these isolates.

452         While the focus of our investigation has been copper resistance, the ICEs  
453 reported here carry a cargo of additional genes, some of which are implicated in  
454 resistance to other metals. In some instances the cargo genes have no similarity  
455 to genes of known function (grey boxes in Figure 2A). ICEs and similar laterally  
456 transferred elements provide opportunity for genes unrelated to copper  
457 resistance, for example gene connected to virulence, to hitchhike and rapidly  
458 spread. In this regard the two plasmids characterized here are of interest: both  
459 carry determinants of streptomycin resistance – an antibiotic that is also sprayed  
460 on New Zealand kiwifruit orchards in order to control *Psa*. The potential for  
461 hitchhiking has been previously noted in the context of antibiotic resistance-  
462 encoding plasmids (Gullberg *et al.*, 2014).

463         Recognition of ICEs along with their potential to change the course of  
464 microbial evolution extends less than twenty years (Wozniak and Waldor, 2010).  
465 While it might be argued that this potential is no different from that long realized  
466 via conjugative plasmids, or phage (Ochman *et al.*, 2000), ICEs, being a composite  
467 of both, seem to have an edge. Unlike conjugative plasmids that rarely integrate  
468 into the host genome, ICEs integrate as a matter of course and are largely  
469 immune to segregational loss; additionally, fitness consequences as a result of  
470 carriage are likely to be minimal. Unlike temperate phages, ICEs do not kill the  
471 host upon transfer, but they can nonetheless mediate transfer upon  
472 encountering transfer proficient conditions. Having control over both vertical

473 and horizontal modes of transmission, while minimizing costs for host cells,  
474 marks these elements as especially potent vehicles of microbial evolution.

475

## 476 **EXPERIMENTAL PROCEDURES**

### 477 **Strains and culture condition**

478 All *Pseudomonas* strains were cultured in King's B medium at 28°C, *E. coli*  
479 was cultured in Luria Bertani medium at 37°C. All liquid overnight cultures were  
480 shaken at 250 rpm. Both kanamycin and nitrofurantoin were used at 50 µg mL<sup>-1</sup>.

481

### 482 **DNA extraction and genome sequencing**

483 For genome sequencing, DNA samples were extracted using the Promega  
484 Wizard® Genomic DNA Purification Kit following the recommended protocol.

485 *Psa* NZ45 was sequenced using the PacBio platform, the remainder were  
486 sequenced using the Illumina HiSeq platform. Sequences are deposited at NCBI  
487 with the following accession numbers: XXXX1, XXXX2 etc (right number of  
488 accession numbers).

489

### 490 **Genomic reconstruction of ICEs**

491 ICEs identified in genome sequences were used as query sequences for  
492 BLAST searches of the NCBI WGS database

493 (<http://blast.ncbi.nlm.nih.gov/Blast.cgi>). Contigs were subsequently

494 downloaded and where ICEs were represented by two contigs they were

495 concatenated in Geneious (<http://www.geneious.com>, Kearse *et al.*, 2012).

496 Concatenation was only required in two instances. ICEs were annotated using

497 the RAST server (<http://rast.nmpdr.org>, Aziz *et al.*, 2008) and manually curated.

498 Alignments were performed using Geneious.

499

#### 500 ***Psa* isolation from kiwifruit orchards**

501 One cm<sup>2</sup> kiwifruit leaf disks were macerated in 200 µl 10mM MgCl<sub>2</sub>. The  
502 macerate was plated on *Pseudomonas* selective media amended with cetrimide,  
503 fucidin and cephalosporin (Oxoid) and incubated at 28°C for 3 days. *Psa* was  
504 identified using either diagnostic PCR or LAMP assays (Rees-George *et al.*, 2010,  
505 Ruinelli *et al.*, 2016).

506

#### 507 **Copper resistance assays**

508 Copper resistance was evaluated by determining the minimal  
509 concentration of copper that inhibited growth (minimal inhibitory  
510 concentration, MIC) on mannitol-glutamate yeast extract medium (MGY) plates  
511 supplemented with CuSO<sub>4</sub>·5H<sub>2</sub>O (Bender and Cooksey, 1986, Cha and Cooksey  
512 1991). *Psa* strains were considered resistant when their MIC exceeded 0.8 mM  
513 CuSO<sub>4</sub>.

514

#### 515 **Mutant development**

516 A Tn5 transposon was used to generate kanamycin resistant (*kanR*)  
517 strains. *E. coli* S17-1 Tn5*hah Sgid1* (Zhang *et al.*, 2015) was used as donor and *E.*  
518 *coli* pK2013 (Ditta *et al.*, 1980) as helper. Helper, donor and recipients were  
519 grown overnight. 200 µl of helper and donor and 2 mL of recipient were  
520 separately washed with 10mM MgCl<sub>2</sub> and then mixed together and washed  
521 again. The mix was then re-suspended in 30 µl of 10 mM MgCl<sub>2</sub>, plated on pre-

522 warmed LB agar plates and incubated for 24-48 hours at 28°C. Cells were then  
523 harvested, resuspended in 1ml of sterile 10 mM MgCl<sub>2</sub> and plated on KB  
524 kanamycin nitrofurantoin plates. Selected mutants were screened for normal  
525 growth in KB, LB and M9.

526

### 527 ***In vitro* growth**

528 Overnight cultures of *Psa* NZ13<sup>kanR</sup> and *Psa* NZ45 were used to determine  
529 the *in vitro* growth of each strain in MGY alone or supplemented with 0.5 and  
530 0.8mM CuSO<sub>4</sub>. 10mL liquid MGY cultures were established with a starting  
531 density of 10<sup>5</sup> cfu mL<sup>-1</sup> and shaken for up to three days. Bacterial growth was  
532 monitored by plating on KB kanamycin (*Psa* NZ13<sup>kanR</sup>), MGY 0.8mM CuSO<sub>4</sub> (*Psa*  
533 NZ45). Three replicates per strain and media combination was used, and the  
534 experiment was repeated three times.

535

### 536 ***In planta* growth**

537 Clonally propagated *Actinidia chinensis* var. 'Hort16A' plantlets were  
538 maintained at 20°C with a light/dark period of 14/10 hours, 70% constant  
539 humidity. *Psa* NZ13<sup>kanR</sup> and *Psa* NZ45 were grown on KB agar plates for 48h at  
540 28°C. Inoculum with a final optical density (OD<sub>600</sub>) of 0.2 of either strain was  
541 prepared in 50 ml 10mM MgCl<sub>2</sub> with 0.002% of Silwet. Three to four week old  
542 plantlets were inoculated by dipping the aerial parts in the inoculum solution for  
543 5 seconds. Five separate plantlets were dip inoculated for each treatment. For  
544 experiments assessing *in planta* growth in copper-sprayed plantlets, Nordox75  
545 was used at the recommended dosage of 0.375g L<sup>-1</sup>.

546 ([www.kvh.org.nz/spray\\_products](http://www.kvh.org.nz/spray_products)). Dip-inoculated plantlets were allowed to dry,

547 then sprayed adaxially and abaxially with Nordox75 until runoff to ensure  
548 complete coverage. Bacterial growth was monitored 0, 3 and 7 days post  
549 inoculation. 1 cm<sup>2</sup> disk leaves were cut using a sterile cork borer, surface  
550 sterilized in 70% ethanol and ground in 200 µl 10mM MgCl<sub>2</sub>. Serial dilutions of  
551 the homogenate were plated on KB kanamycin to count *Psa* NZ13<sup>kanR</sup> and MGY  
552 0.8mM CuSO<sub>4</sub> to count *Psa* NZ45. Each experiment was repeated 3 times.

553

#### 554 ***In vitro* and *in planta* competition assays**

555 *In vitro* and *in planta* competition assays were conducted as described  
556 earlier for single strains, except that *Psa* NZ45 and *Psa* NZ13<sup>kanR</sup> were  
557 coinoculated in a 1:1 mix. Bacterial growth was monitored by plating serial  
558 dilutions on KB kanamycin (*Psa* NZ13<sup>kanR</sup>), MGY 0.8mM CuSO<sub>4</sub> (*Psa* NZ45) and on  
559 MGY kanamycin 0.8mM CuSO<sub>4</sub> (*Psa* NZ13<sup>kanR</sup> that acquired copper resistance). *In*  
560 *vitro* assays had three replicates per strain, *in planta* assays were conducted  
561 using five replicates, each experiment was repeated three times. Fitness was  
562 calculated as ratio between their Malthusian Parameters (Lenski *et al.*, 1991).

563

#### 564 **ICE integration screening**

565 Primers used in this study are listed in Supp Table 2. Four primers were  
566 designed to detect the genomic location of ICE integration: two specific for the  
567 integrases at the end of each ICEs (*IntPsaNZ45*, *IntPsaNZ13*) and two for the ICE  
568 insertion site on the chromosome, annealing to the *clpB* (*att-1* site) and *queC*  
569 (*att-2* site) genes. The primer combination (*IntPsaNZ45-att-2*, *IntPsaNZ45-att-1*,  
570 *IntPsaNZ13-att-1*, and *IntPsaNZ13-att-2*) indicates the location of the ICEs.  
571 Another two sets of primers were designed to amplify either CuR (*copA*) or

572 enolase genes present in the VR of *Psa*<sub>NZ45</sub>ICE\_Cu and *Psa*<sub>NZ13</sub>ICE\_eno,  
573 respectively. PCRs were performed using Thermo Scientific *Taq DNA Polymerase*  
574 following the manufacturer's instructions.

575

#### 576 **ICE mobilization assay**

577 *Psa* NZ45 was used as the ICE donor. Strains tested in the mobilization  
578 assays included are listed in order of divergence relative to the donor: *Psa* K28  
579 (biovar 2) (McCann *et al.*, 2013), *Psa* J31 (biovar 1) (McCann *et al.*, 2013),  
580 *Pseudomonas syringae* pv. *actinidifoliorum* NZ9 (McCann *et al.*, 2013),  
581 *Pseudomonas syringae* pv. *tomato* DC3000 (Buell *et al.*, 2003), *Pseudomonas*  
582 *syringae* pv. *phaseolicola* 1448a (Teverson, 1991), *Pseudomonas syringae* H24 and  
583 H33 (isolated from kiwifruit; C. Straub, unpublished data), *Pseudomonas*  
584 *fluorescens* SBW25 (Zhang *et al.*, 2006) and *Pseudomonas aeruginosa* PAO1  
585 (Holloway, 1955). The copper sulphate MIC was determined for all tested  
586 recipient strains, which were all tagged with kanamycin Tn5. A biparental  
587 mating was performed using 2 mL and 200µl of washed recipient and *Psa* NZ45  
588 cells, respectively. The cells were mixed, centrifuged briefly and resuspended in  
589 30µl of 10 mM MgCl<sub>2</sub> alone, 10 mM MgCl<sub>2</sub> with 0.5mM CuSO<sub>4</sub> or 30 µl of 1 cm<sup>2</sup>  
590 kiwifruit plantlet macerate in 200µl of 10 mM MgCl<sub>2</sub> if requested. The cell  
591 mixture was plated onto solid media (M9 plates) and incubated at 28°C for 48  
592 hours. Cells were then harvested and resuspended in 1ml of sterile 10 mM MgCl<sub>2</sub>.  
593 Serial dilutions were plated on KB kanamycin to count the total number of  
594 recipients and on MGY amended with kanamycin and copper sulphate at  
595 recipient MIC to count transconjugants.

596



597 **Biosecurity and approval**

598 All worked was performed in approved facilities and in accord with

599 APP201675, APP201730, APP202231.

600

601 **ACKNOWLEDGMENTS**

602 We gratefully acknowledge Zespri International Limited and Te Puke Fruit

603 Growers Association for financial support. The sponsors had no role in the

604 design, collation, or interpretation of data. We thank kiwifruit growers in Te

605 Puke for the access to orchards, Denis Robinson for providing Nordox75, and

606 Daniel Rexin for assistance with isolating *Psa* from kiwifruit leaves.

607

608 **REFERENCES**

609 Abelleira, A., López, M.M., Peñalver, J., Aguín, O., Mansilla, J.P., Picoaga, A. and

610 García, M.J. (2011) First report of bacterial canker of kiwifruit caused by

611 *Pseudomonas syringae* pv. *actinidiae* in Spain. Plant Dis 95: 1583.

612 Andersson, D.I. and Hughes, D. (2010) Antibiotic resistance and its cost: is it

613 possible to reverse resistance? Nature Reviews Microbiology 8: 260–271.

614 Aziz, R.K., Bartels, D., Best, A.A., DeJongh, M., Disz, T., Edwards, R.A. *et al.* (2008)

615 The RAST Server: rapid annotations using subsystems technology. BMC

616 Genomics 9: 75-10.1186/1471-2164-9-75.

617 Balestra, G.M., Renzi, M. and Mazzaglia, A. (2010) First report of bacterial canker

618 of *Actinidia deliciosa* caused by *Pseudomonas syringae* pv. *actinidiae* in

619 Portugal. New Dis Rep 22: 10.

620 Beaber, J.W., Hochhut, B. and Waldor, M.K. (2002) Genomic and functional

621 analyses of SXT, an integrating antibiotic resistance gene transfer element

- 622 derived from *Vibrio cholerae*. J Bacteriol 184: 4259–4269.
- 623 Bender, C.L. and Cooksey, D.A. (1986) Indigenous plasmids in *Pseudomonas*  
624 *syringae* pv. *tomato*: conjugative transfer and role in copper resistance. J.  
625 Bacteriol 165: 534-541.
- 626 Bondarczuk, K. and Piotrowska-Seget, Z. (2013) Molecular basis of active copper  
627 resistance mechanisms in Gram-negative bacteria. Cell Biol Toxicol 29: 397–  
628 405.
- 629 Buell, C.R., Joardar, V., Lindeberg, M., Selengut, J., Paulsen, I.T., Gwinn, M.L. *et al.*  
630 (2003) The complete genome sequence of the Arabidopsis and tomato  
631 pathogen *Pseudomonas syringae* pv. *tomato* DC3000. Proc Nat Acad Sci U S A  
632 100: 10181–10186.
- 633 Burrus, V., Marrero, J. and Waldor, M.K. (2006) The current ICE age: biology and  
634 evolution of SXT-related integrating conjugative elements. Plasmid 55: 173–  
635 183.
- 636 Butler, M.I., Stockwell, P.A., Black, M.A., Day, R.C., Lamont, I.L. and Poulter, R.T.M.  
637 (2013) *Pseudomonas syringae* pv. *actinidiae* from recent outbreaks of kiwifruit  
638 bacterial canker belong to different clones that originated in China. PLoS ONE  
639 8: e57464.
- 640 Cha, J.S. and Cooksey, D.A. (1993) Copper hypersensitivity and uptake in  
641 *Pseudomonas syringae* containing cloned components of the copper resistance  
642 operon. Appl Environ Microbiol 59: 1671–1674.
- 643 Dimopoulou, I.D., Kartali, S.I., Harding, R.M., Peto, T.E.A. and Crook, D.W. (2007)  
644 Diversity of antibiotic resistance integrative and conjugative elements among  
645 haemophili. J Med Microbiol 56: 838–846.
- 646 Ditta, G., Stanfield, S., Corbin, D., Helinski, D.R. (1980) Broad host range DNA

- 647 cloning system for gram-negative bacteria: construction of a gene bank of  
648 *Rhizobium meliloti*. Proc Natl Acad Sci U S A 77: 7347–7351.
- 649 Drenkard, E. and Ausubel, F.M. (2002) *Pseudomonas* biofilm formation and  
650 antibiotic resistance are linked to phenotypic variation. Nature 416: 740–743.
- 651 Everett, K.R., Taylor, R.K., Romberg, M.K., Rees-George, J., Fullerton, R.A.,  
652 Vanneste, J.L. and Manning, M.A. (2011) First report of *Pseudomonas syringae*  
653 pv. *actinidiae* causing kiwifruit bacterial canker in New Zealand. Australasian  
654 Plant Dis Note 6: 67–71.
- 655 Fang, Y., Wu, L., Chen, G., Feng, G. (2016) Complete genome sequence of  
656 *Pseudomonas azotoformans* S4, a potential biocontrol bacterium. J Biotechnol  
657 227: 25-26.
- 658 Feil, H., Feil, W.S., Chain, P., Larimer, F., Di Bartolo, G., Copeland, A., *et al.* (2005)  
659 Comparison of the complete genome sequences of *Pseudomonas syringae* pv.  
660 *syringae* B728a and pv. *tomato* DC3000. Proc Natl Acad Sci U S A 102: 11064-  
661 11069.
- 662 Fondi, M., Karkman, A., Tamminen, M.V., Bosi, E., Virta, M., Fani, R. *et al.* (2016)  
663 “Every gene is everywhere but the environment selects”: global  
664 geolocalization of gene sharing in environmental samples through network  
665 analysis. Genome Biol Evol 8: 1388–1400.
- 666 Garriss, G., Waldor, M.K. and Burrus, V. (2009) Mobile antibiotic resistance  
667 encoding elements promote their own diversity. PLoS Genetic 5: e1000775.
- 668 Guglielmini, J., Quintais, L., Garcillán-Barcia, M. P., de la Cruz, F., Rocha, E.P.  
669 (2011) The repertoire of ICE in prokaryotes underscores the unity, diversity,  
670 and ubiquity of conjugation. PLoS Genet 7: e1002222.
- 671 Gullberg, E., Albrecht, L.M., Karlsson, C., Sandegren, L. and Andersson, D.I. (2014)

672 Selection of a multidrug resistance plasmid by sublethal levels of antibiotics  
673 and heavy metals. *mBio* 5: e01918–14.

674 Gutiérrez-Barranquero, J.A., de Vicente, A., Carrión, V.J., Sundin, G.W. and Cazorla,  
675 F.M. (2013) Recruitment and rearrangement of three different genetic  
676 determinants into a conjugative plasmid increase copper resistance in  
677 *Pseudomonas syringae*. *Appl Environ Microbiol* 79: 1028–1033.

678 Holloway, B.W. (1955) Genetic recombination in *Pseudomonas aeruginosa*. *J Gen*  
679 *Microbiol* 13: 572–581.

680 Johnson, C.M. and Grossman, A.D. (2015) Integrative and conjugative elements  
681 (ICEs): what they do and how they work. *Annu Rev Genet* 49: 577–601.

682 Juhas, M., Power, P.M., Harding, R.M., Ferguson, D.J., Dimopoulou, I.D., Elamin,  
683 A.R., *et al.* (2007) Sequence and functional analyses of *Haemophilus* spp.  
684 genomic islands. *Genome Biol* 8: R237.

685 Kearse, M., Moir, R., Wilson, A., Stones-Havas, S., Cheung, M., Sturrock, S., *et al.*  
686 (2012). Geneious Basic: an integrated and extendable desktop software  
687 platform for the organization and analysis of sequence data. *Bioinformatics*  
688 28: 1647-1649.

689 Kung, V.L., Ozer, E.A. and Hauser, A.R. (2010) The accessory genome of  
690 *Pseudomonas aeruginosa*. *Microbiol Mol Biol Rev* 74: 621–641.

691 Lenski, R.E., Rose, M.R., Simpson, S.C. and Tadler, S.C. (1991) Long-term  
692 experimental evolution in *Escherichia coli*. I. Adaptation and divergence  
693 during 2,000 generations. *Am Nat* 138: 1315–1341.

694 Lilley, A.K., Bailey, M.J. (1997) Impact of plasmid pQBR103 acquisition and  
695 carriage on the phytosphere fitness of *Pseudomonas fluorescens* SBW25:  
696 burden and benefit. *Appl Environ Microbiol* 63: 1584–1587.

- 697 Lovell, H.C., Mansfield, J.W., Godfrey, S.A.C., Jackson, R.W., Hancock, J.T. and  
698 Arnold, D.L. (2009). Bacterial evolution by genomic island transfer occurs via  
699 DNA transformation *in planta*. *Curr Biol* 19: 1586–1590.
- 700 Mazzaglia, A., Studholme, D.J., Taratufolo, M.C., Cai, R., Almeida, N.F., Goodman, T.,  
701 *et al.* (2012) *Pseudomonas syringae* pv. *actinidiae* (PSA) isolates from recent  
702 bacterial canker of kiwifruit outbreaks belong to the same genetic lineage.  
703 *PLoS One* 7: e36518.
- 704 Mergeay, M., Monchy, S., Vallaey, T., Auquier, V., Benotmane, A., Bertin, P., *et al.*  
705 (2003) *Ralstonia metallidurans*, a bacterium specifically adapted to toxic  
706 metals: towards a catalogue of metal-responsive genes. *FEMS Microbiol Rev*  
707 27: 385–410.
- 708 McCann, H.C., Rikkerink, E.H.A., Bertels, F., Fiers, M., Lu, A., Rees-George, J., *et al.*  
709 (2013) Genomic analysis of the kiwifruit pathogen *Pseudomonas syringae* pv.  
710 *actinidiae* provides insight into the origins of an emergent plant disease. *PLoS*  
711 *Pathogens* 9: e1003503.
- 712 McCann, H.C., Li, L., Liu, Y., Templeton, M.D., Colombi, E., Straub, C., *et al.* (2016)  
713 The origin and evolution of a pandemic lineage of the kiwifruit pathogen  
714 *Pseudomonas syringae* pv. *actinidiae*. In review.
- 715 Mohd-Zain, Z., Turner, S.L., Cerdano-Tarraga, A.M., Lilley, A.K., Inzana, T.J.,  
716 Duncan, A.J., *et al.* (2004) Transferable antibiotic resistance elements in  
717 *Haemophilus influenzae* share a common evolutionary origin with a diverse  
718 family of syntenic genomic islands. *J Bacteriol*, 186: 8114–8122.
- 719 Morgan, R.K. and Taylor, E. (2004) Copper accumulation in vineyard soils in New  
720 Zealand. *Environ Sci* 1:2, 139-167.
- 721 Nakajima, M., Goto, M. and Hibi, T. (2002) Similarity between copper resistance

- 722 genes from *Pseudomonas syringae* pv. *actinidiae* and *P. syringae* pv. *tomato*, J  
723 Gen Plant Pathol 68: 68–74.
- 724 Neale, H. C., Laister, R., Payne, J., Preston, G., Jackson, R. W. and Arnold, D. L.  
725 (2016) A low frequency persistent reservoir of a genomic island in a pathogen  
726 population ensures island survival and improves pathogen fitness in a  
727 susceptible host. Environ Microbiol *Accepted Author Manuscript*.  
728 doi:10.1111/1462-2920.13482
- 729 Ochman, H., Lerat, E., Daubin, V. (2005) Examining bacterial species under the  
730 specter of gene transfer and exchange. Proc Natl Acad Sci U S A 102 Suppl 1:  
731 6595-6599.
- 732 Ochman, H., Lawrence, J.G. and Groisman, E.A. (2010) Lateral gene transfer and  
733 the nature of bacterial innovation. Nature 405: 299–304.
- 734 Peters, S.E., Hobman, J.L., Strike, P. and Ritchie, D.A. (1991) Novel mercury  
735 resistance determinants carried by IncJ plasmids pMERPH and R391. Mol Gen  
736 Genet 228: 294–299.
- 737 Pitman, A.R., Jackson, R.W., Mansfield, J.W., Kaitell, V., Thwaites, R., *et al.* (2005)  
738 Exposure to host resistance mechanisms drives evolution of bacterial  
739 virulence in plants. Curr Biol 15: 2230–2235.
- 740 Polz, M.F., Alm, E.J., and Hanage, W.P. (2013) Horizontal gene transfer and the  
741 evolution of bacterial and archaeal population structure. Trends Genet 29:  
742 170–175.
- 743 Quiroz, T.S., Nieto, P.A., Tobar, H.E., Salazar-Echegarai, F.J., Lizana, R.J., Quezada  
744 C.P., *et al.* (2011) Excision of an unstable pathogenicity island in *Salmonella*  
745 *enterica* serovar *enteritidis* is induced during infection of phagocytic cells.  
746 PLoS ONE 6: e26031.

- 747 Ramsay, J.P., Sullivan, J.T., Stuart, G.S., Lamont, I.L. and Ronson, C.W. (2006)  
748       Excision and transfer of the *Mesorhizobium loti* R7A symbiosis island requires  
749       an integrase IntS, a novel recombination directionality factor RdfS, and a  
750       putative relaxase RlxS. *Mol Microbiol* 62: 723–734.
- 751 Rauch, P.J.G. and De Vos, W.M. (1992) Characterization of the novel nisin-sucrose  
752       conjugative transposon Tn5276 and its insertion in *Lactococcus lactis*. *J*  
753       *Bacteriol* 174: 1280-1287.
- 754 Ravatn, R., Studer, S., Springael, D., Zehnder, A.J.B. and Van Der Meer, J.R. (1998)  
755       Chromosomal integration, tandem amplification, and deamplification in  
756       *Pseudomonas putida* F1 of a 105-kilobase genetic element containing the  
757       chlorocatechol degradative genes from *Pseudomonas* sp. strain B13. *J Bacteriol*  
758       180: 4360–4369.
- 759 Rees-George, J., Vanneste, J.L., Cornish, D.A., Pushparajah, I.P.S., Yu, J., Templeton,  
760       M.D. and Everett, K.R. (2010) Detection of *Pseudomonas syringae* pv. *actinidiae*  
761       using polymerase chain reaction (PCR) primers based on the 16S-23S rDNA  
762       intertranscribed spacer region and comparison with PCR primers based on  
763       other gene regions. *Plant Pathol* 59: 453–464.
- 764 Rensing, C. and Grass, G. (2003) *Escherichia coli* mechanisms of copper  
765       homeostasis in a changing environment. *FEMS Microbiol Rev* 27: 197–213.
- 766 Roberts, A.P. and Mullany, P. (2009) A modular master on the move: the Tn916  
767       family of mobile genetic elements. *Trends Microbiol* 17: 251–258.
- 768 Ruinelli, M., Schneeberger, P.H.H., Ferrante, P., Bühlmann, A., Scortichini, M.,  
769       Vanneste, J.L., *et al.* (2016) Comparative genomics-informed design of two  
770       LAMP assays for detection of the kiwifruit pathogen *Pseudomonas syringae* pv.  
771       *actinidiae* and discrimination of isolates belonging to the pandemic biovar 3.

- 772 Plant Pathol doi:10.1111/ppa.12551.
- 773 Staehlin, B.M., Gibbons, J.G., Rokas, A., O'Halloran, T.V. and Slot, J.C. (2016)
- 774 Evolution of a heavy metal homeostasis/resistance island reflects increasing
- 775 copper stress in *Enterobacteria*. *Genome Biol Evol* 8: 811-826.
- 776 Stoesser, N., Giess, A., Batty, E.M., Sheppard, A.E., Walker, A.S., Wilson, D.J., *et al.*
- 777 (2014) Genome sequencing of an extended series of NDM-producing *Klebsiella*
- 778 *pneumoniae* isolates from neonatal infections in a Nepali hospital
- 779 characterizes the extent of community- versus hospital-associated
- 780 transmission in an endemic setting. *Antimicrob Agents Chemother* 58: 7347–
- 781 7357.
- 782 Sullivan, J.T., Patrick, H.N., Lowther, W.L., Scott, D.B. and Ronson, C.W. (1995)
- 783 Nodulating strains of *Rhizobium loti* arise through chromosomal symbiotic
- 784 gene transfer in the environment. *Proc Natl Acad Sci USA* 92: 8985–8989.
- 785 Sullivan, J.T. and Ronson, C.W. (1998) Evolution of rhizobia by acquisition of a
- 786 500-kb symbiosis island that integrates into a phe-tRNA gene. *Proc Natl Acad*
- 787 *Sci USA* 95: 5145–514.
- 788 Templeton, M.D., Warren, B.A., Andersen, M.T., Rikkerink, E.H.A., Fineran, P.C.
- 789 (2015) Complete DNA sequence of *Pseudomonas syringae* pv. *actinidiae*, the
- 790 causal agent of kiwifruit canker disease. *Genome Announc* 3: e01054-15.
- 791 Teverson, D.M. (1991) Genetics of pathogenicity and resistance in the halo-blight
- 792 disease of beans in Africa. Ph.D. thesis. University of Birmingham,
- 793 Birmingham, United Kingdom.
- 794 Vanga, B.R., Ramakrishnan, P., Butler, R.C., Toth, I.K., Ronson, C.W., Jacobs, J.M.E.
- 795 and Pitman, A.R. (2015) Mobilization of horizontally acquired island 2 is
- 796 induced in plantain the phytopathogen *Pectobacterium atrosepticum*



797 SCRI1043 and involves the putative relaxase ECA0613 and quorum sensing.  
798 Environ Microbiol 17: 4730–4744.

799 Vanneste, J.L., Giovanardi, D., Yu, J., Cornish, D.A., Kay, C., Spinelli, F. and Stefani,  
800 E. (2011) Detection of *Pseudomonas syringae* pv. *actinidiae* in kiwifruit pollen  
801 samples. N Z Plant Protect 64: 246-251.

802 Visnovsky, S.B., Fiers, M., Lu, A., Panda, P., Taylor, R. and Pitman, A.R. (2016)  
803 Draft genome sequences of 18 strains of *Pseudomonas* isolated from kiwifruit  
804 plants in New Zealand and overseas. Genome Announc 4: e00061–16.

805 Wozniak, R.A.F. and Waldor, M.K. (2010) Integrative and conjugative elements:  
806 mosaic mobile genetic elements enabling dynamic lateral gene flow. Nat Rev  
807 Microbiol 8: 552–563.

808 Zhang, X.X., Gauntlett, J.C., Oldenburg, D.G., Cook, G.M. and Rainey, P.B. (2015)  
809 role of the transporter-like sensor kinase CbrA in histidine uptake and signal  
810 transduction. J Bacteriol 197: 2867–2878.

811 Zhang, X.X., George, A., Bailey, M.J. and Rainey, P.B. (2006) The histidine  
812 utilization (*hut*) genes of *Pseudomonas fluorescens* SBW25 are active on plant  
813 surfaces, but are not required for competitive colonization of sugar beet  
814 seedlings. Microbiol 152: 1867–1875.

815

816 **TABLE AND FIGURE**

817

818

819

820

821

822

823

824

825

826

827

828

829

830

831

| Isolate ID                     | Place of Isolation | Year of Isolation | Host of Isolation | Orchard's copper Programme | MIC to CuSO <sub>4</sub> | GenBank Accession                | ICMP number |
|--------------------------------|--------------------|-------------------|-------------------|----------------------------|--------------------------|----------------------------------|-------------|
| <i>Psa</i> NZ13                | Te Puke, NZ        | 2010              | Kiwifruit         | NA                         | 0.8 mM                   | CP011972.1                       | 18884       |
| <i>Psa</i> NZ45                | Te Puke, NZ        | 2014              | Kiwifruit         | Full spray                 | 1.2 mM                   | XXXX1                            | 20586       |
| <i>Psa</i> NZ47                | Te Puke, NZ        | 2014              | Kiwifruit         | Spray free                 | 1.2 mM                   | XXXX2                            | 22180       |
| <i>Psa</i> NZ62                | Te Puke, NZ        | 2015              | Kiwifruit         | Organic                    | 1.2 mM                   | XXXX3                            | 22181       |
| <i>Psa</i> NZ63                | Te Puke, NZ        | 2015              | Kiwifruit         | To minimum                 | 1.2 mM                   | XXXX4                            | 22182       |
| <i>Psa</i> NZ64                | Te Puke, NZ        | 2016              | Kiwifruit         | Spray free                 | 1.2 mM                   | XXXX5                            | 22183       |
| <i>Psa</i> NZ65                | Te Puke, NZ        | 2016              | Kiwifruit         | Full spray                 | 1.5 mM                   | XXXX6                            | 22184       |
| <i>Psa</i> NZ66                | Coromandel, NZ     | 2016              | Kiwifruit         | Full spray                 | 1.5 mM                   | XXXX7                            | 22185       |
| <i>Ppa</i> LGM2367             | Madison, USA       | 1921-1922         | Proso millet      | NA                         | NA                       | ALACO1000019.1<br>ALACO1000062.1 |             |
| <i>Ppf</i> ICMP4394            | Auckland, NZ       | 1968              | Wheat             | NA                         | NA                       | LJP001000111.1<br>LJP001000188.1 | 4394        |
| <i>P. manginialis</i> ICMP4394 | Katikati, NZ       | 1991              | Kiwifruit         | NA                         | NA                       | LKGR010000860.1                  | 4394        |
| <i>Psa</i> 12                  | Japan              | 1988              | Kiwifruit         | NA                         | NA                       | AGNQ01000195                     |             |
| <i>Pfm</i> ICMP19497           | Te Puke, NZ        | 2010              | Kiwifruit         | NA                         | NA                       | LKEQ01000112.1                   | 19497       |

832 **Table 1. List of genomes used in this study.**

833

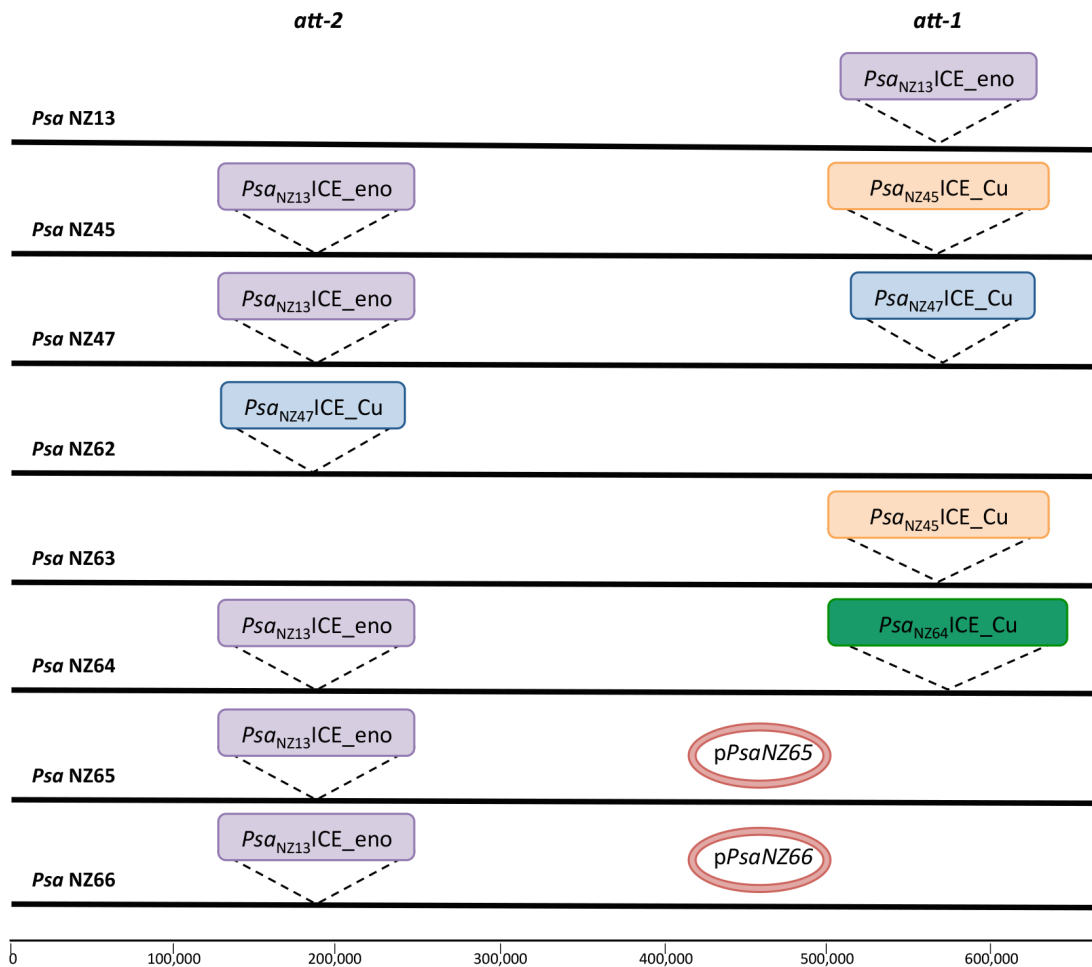

834

835 **Figure 1. Genomic location of *Psa*ICEs in *Psa* NZ13.** In purple the

836 *Psa*<sub>NZ13</sub>|ICE\_eno (100 kb), in orange *Psa*<sub>NZ45</sub>|ICE\_Cu (107 kb), in blue the

837 *Psa*<sub>NZ47</sub>|ICE\_Cu (90 kb), in green the *Psa*<sub>NZ64</sub>|ICE\_Cu (130 kb), p*Psa*NZ65 and

838 p*Psa*NZ66 plasmids are 111 kb. Each island is bounded by 52 bp *att* sequences

839 overlapping tRNA<sup>Lys</sup>. In *Psa* NZ13 the *att-1* site is located at 5,534,632 bp, *att-2*

840 at 1,733,972 bp. The figure is not to scale (the entire genome of 6.7 Mbp is

841 indicated a single black line). Both *Psa*<sub>NZ13</sub>|ICE\_Eno and *Psa*<sub>NZ47</sub>|ICE\_Cu ICEs were

842 detected in *Psa* NZ47 by sequencing, but analysis of independent colonies from

843 the freezer stock show that *Psa*<sub>NZ13</sub>|ICE\_Eno is prone to loss.

844

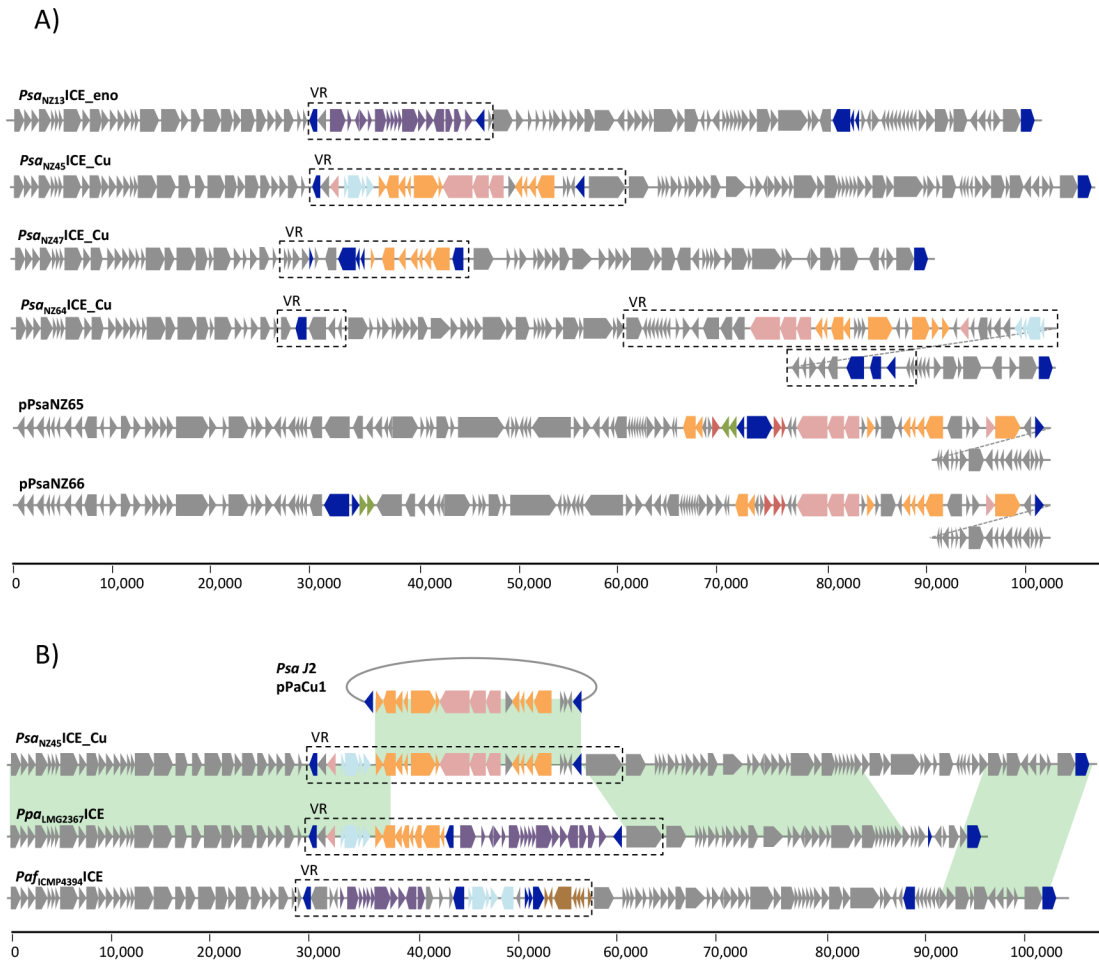

845

846 **Figure 2. Genetic organization of ICEs and plasmids acquired by *Psa* and**

847 **mosaicism of *Psa*<sub>NZ45</sub>ICE\_Cu.**

848 **A)** Blue boxes are mobile genes (transposases or recombinases), purple boxes  
 849 define the ‘enolase region’, orange boxes depict copper resistance genes, azure  
 850 boxes are arsenic resistance genes, pink boxes are genes belonging to the *czc/cus*  
 851 system, green boxes are streptomycin resistance genes, red boxes are cation  
 852 transporter ATPases, brown boxes denote genes encoding mercury resistance.

853 Core “backbone” and other cargo genes are depicted as grey boxes. Dotted

854 diagonal lines indicate continuation of the element.

855 **B)** Areas in green show more than 99% pairwise nucleotide identity.

856 *Psa*<sub>NZ45</sub>ICE\_Cu and *Ppa*<sub>LGM2367</sub>ICE share identity both in the first 38 kb and 20 kb

857 downstream of VR. The remaining 20 kb of the *Psa*<sub>NZ45</sub>ICE\_Cu VR is almost

858 identical to pPaCu1 (it differs by just 2 SNPs). The last 12.5 kb of *Psa*<sub>NZ45</sub>ICE\_Cu is

859 identical to *Paf*<sub>ICMP4394</sub>ICE.

860

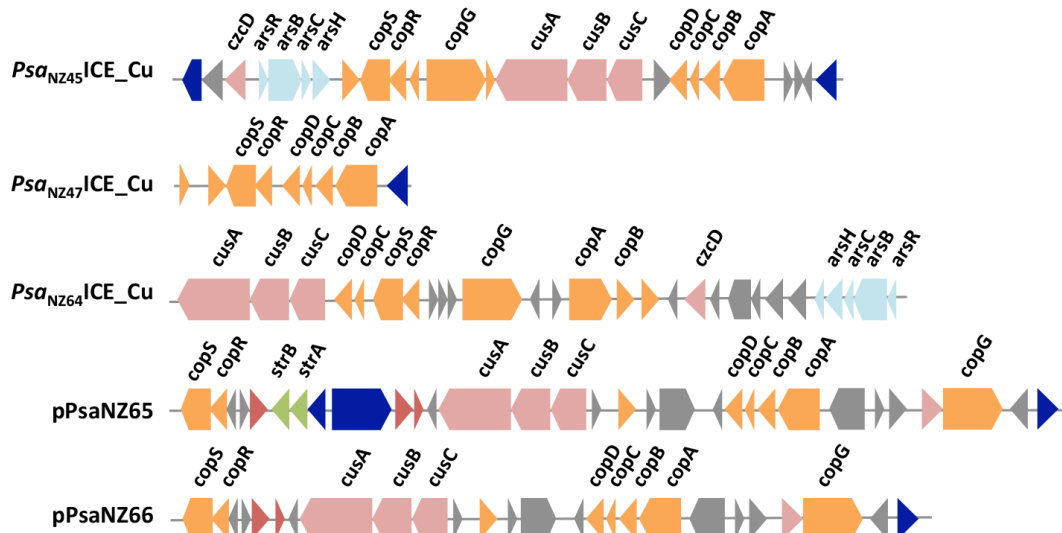

861

862

863 **Figure 3. Genetic organization of metal resistance loci.** Blue boxes are mobile

864 genes (transposases or recombinases), orange boxes depict copper resistance

865 genes, azure boxes are arsenic resistance genes, pink boxes are genes belonging

866 to the *czc/cus* system, green boxes are streptomycin resistance genes and other

867 genes are depicted as grey boxes.

868

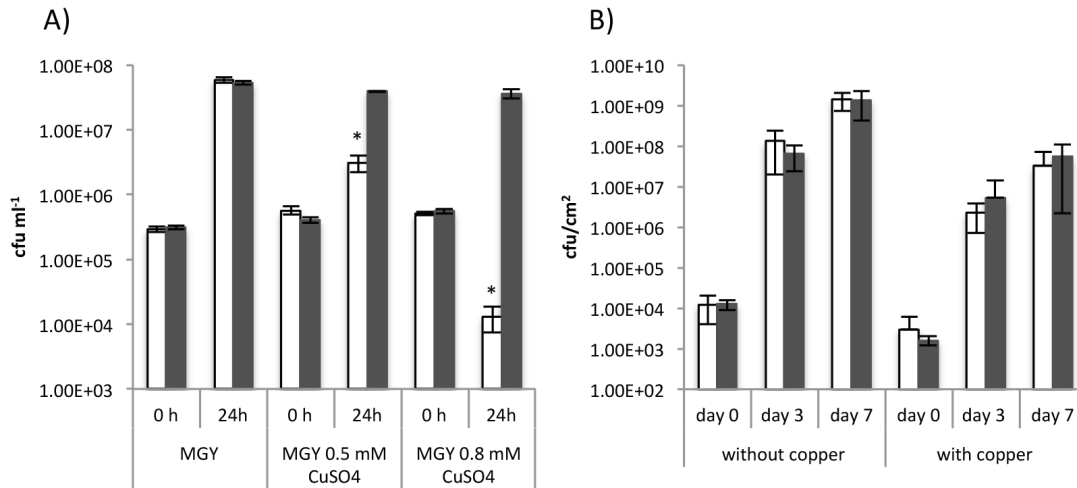

869

870 **Figure 4. Effect of copper ions on growth of *Psa* NZ13 and *Psa* NZ45.**

871 **A)** *Psa* NZ13 (white bars) and *Psa* NZ45 (grey bars) were grown for 24 h in

872 shaken MGY culture and MGY supplemented with 0.5mM and 0.8 mM CuSO<sub>4</sub>.

873 Data are means and standard deviation of three independent cultures. \*indicates

874 significant difference  $P < 0.05$  (one tailed *t*-test)).

875 **B)** The single growth of *Psa* NZ13 (white bars) and *Psa* NZ45 (grey bars) was

876 assessed endophytically on leaves of the kiwifruit cultivar Hort16A. Data are

877 means and standard deviation of five replicates. The copper product Nordox75

878 (0.375g L<sup>-1</sup>) was sprayed adaxially and abaxially until run off. Data are means

879 and standard deviation of 5 replicates. One tailed *t*-test showed no statistical

880 difference in growth between of *Psa* NZ13 and NZ45 in absence or presence of

881 copper.

882

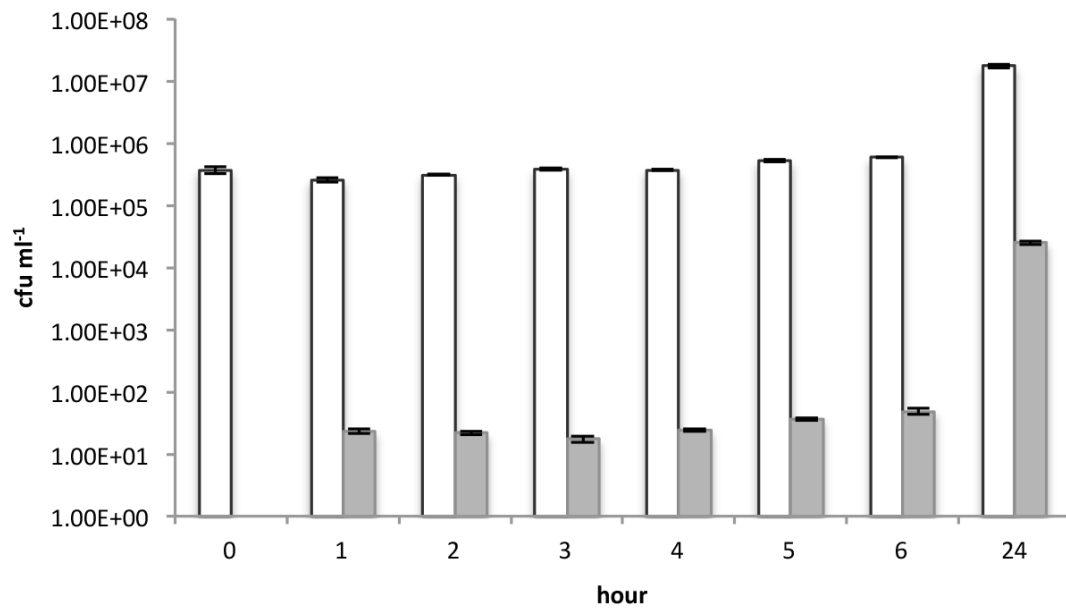

883

884 **Figure 5. *In vitro* transfer of *Psa*<sub>NZ45</sub>ICE\_Cu from *Psa* NZ45 to *Psa* NZ13.**

885 Colony forming units of the recipient *Psa* NZ13 (white bars) and *Psa* NZ13

886 carrying *Psa*<sub>NZ45</sub>ICE\_Cu (transconjugants, grey bars) was monitored during co-

887 cultivation. Data are means and standard deviation of 3 independent cultures

888

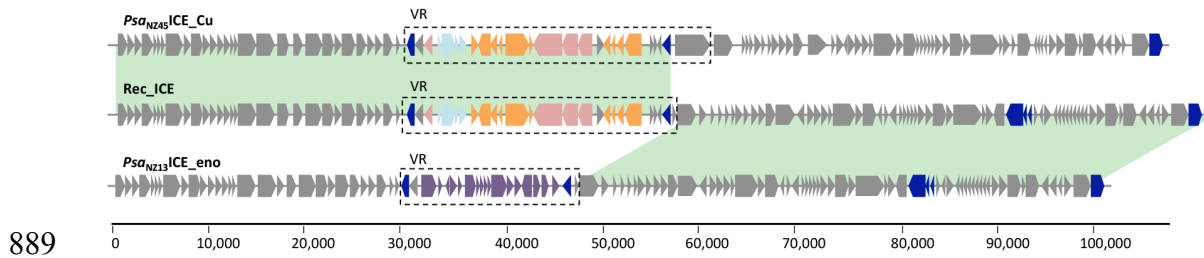

889

890 **Figure 6. Structure and mosaicism of the recombinant ICE (Rec\_ICE) in**

891 **transconjugant Psa NZ13.** Areas highlighted in green show 100% pairwise

892 identity. The recombination break point is inside the variable region (VR). Blue

893 boxes are mobile genes (transposases or recombinases), purple boxes define the

894 'enolase region' (McCann *et al.* 2013), orange boxes depict copper resistance

895 genes, azure boxes are arsenic resistance genes and pink boxes are genes

896 belonging to the *czc/cus* system. Core "backbone" and other cargo genes are

897 depicted as grey boxes.

898

899

900

901

902

903

904

905

906

907

908

909

910



911 SUPPORTING INFORMATION

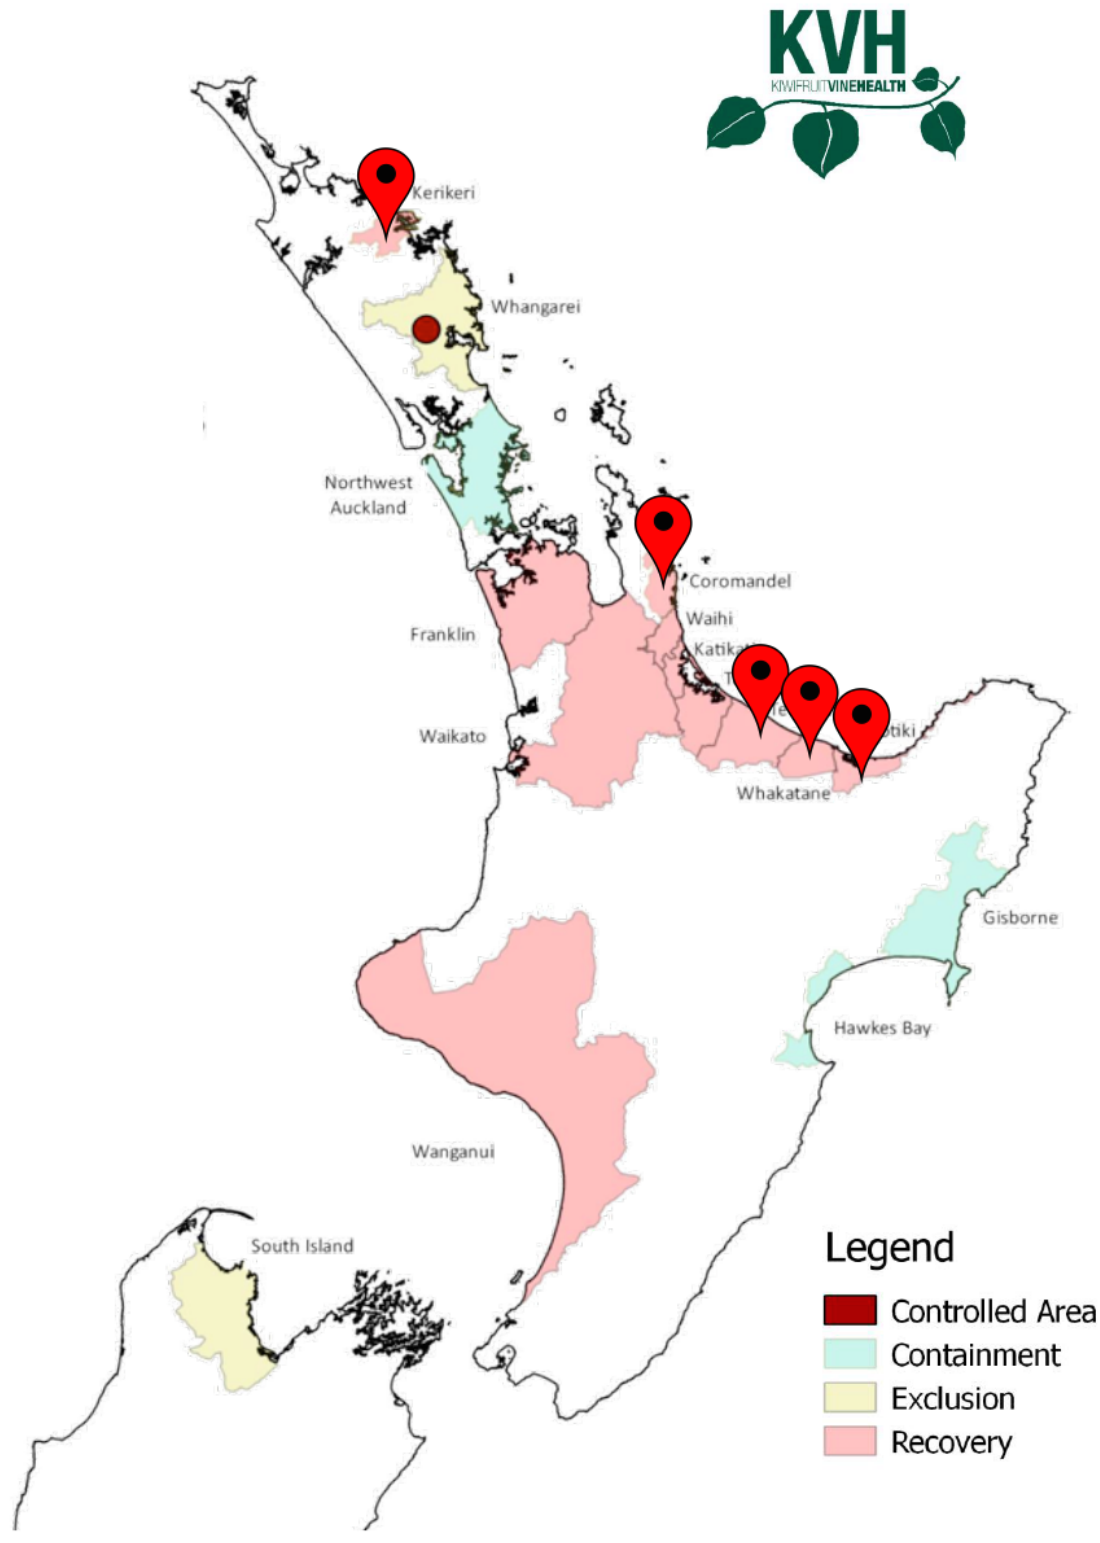

912

913 **Figure S1** – New Zealand kiwifruit growing regions with isolation sites of copper  
914 resistant *Psa*. Map was modified from regional classification map of June 2016  
915 (Kiwi Vine Health (KVVH)).

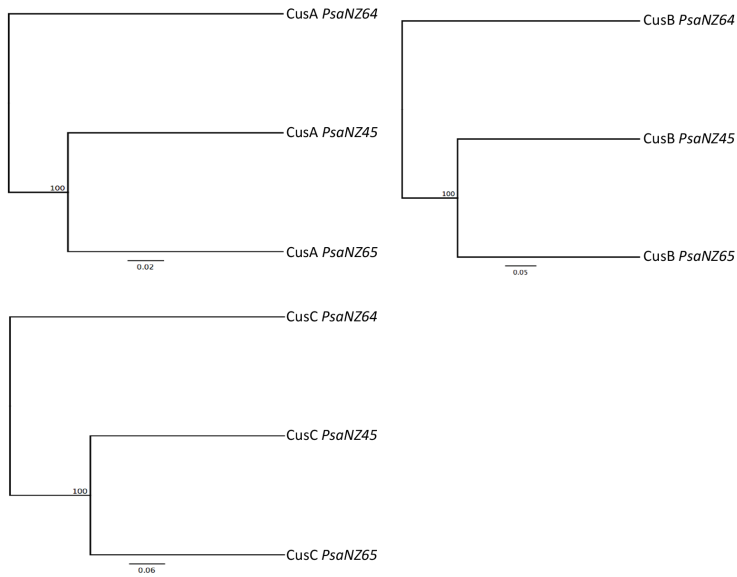

916

917 **Figure S2 - UPMGA tree of the Cus system proteins in Psa NZ.** Bootstrap

918 values are shown at each node.

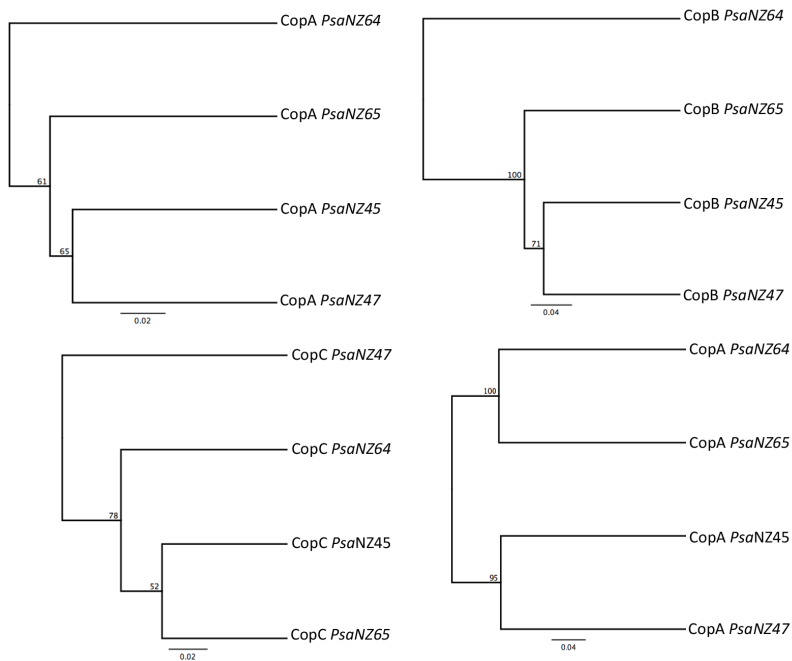

919

920 **Figure S3 - UPMGA trees of the Cop proteins genes in Psa NZ.** Bootstrap

921 values are shown at each node.

922

923

924

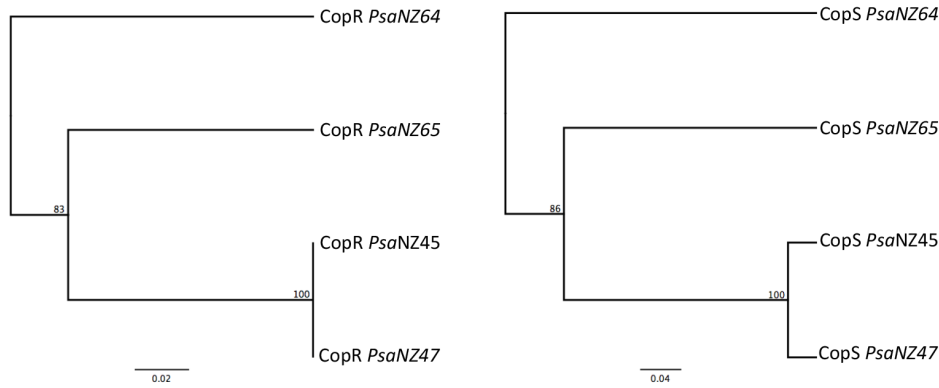

926 **Figure S4 - UPMGA trees of CopR and CopS proteins in *Psa* NZ.** Bootstrap  
927 values are shown at each node.

928

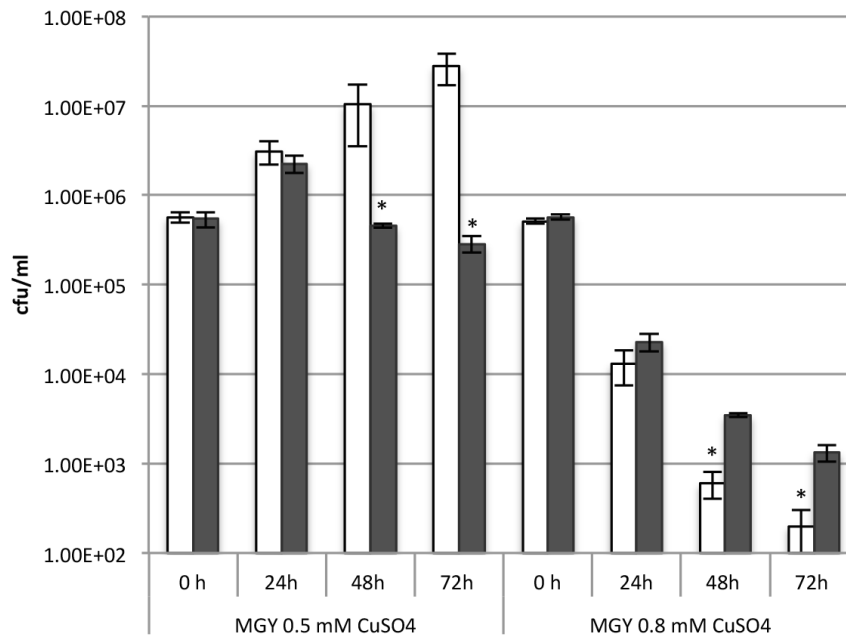

930 **Figure S5. Density of single and co-cultured *Psa* in liquid MGY**

931 **supplemented with 0.5 mM and 0.8 mM CuSO<sub>4</sub>.** *Psa* NZ13 was cultured alone  
932 (white bars) or co-cultured with *Psa* NZ45 (grey bars). Data are means and  
933 standard deviation of three independent cultures. \*indicates significance at 5%  
934 level by one-tailed *t*-test.

935

936

|                                   | Frequency of <i>Psa</i> <sub>NZ45</sub> <i>ICE</i> _Cu transconjugants |                        |
|-----------------------------------|------------------------------------------------------------------------|------------------------|
| <i>Psa</i> NZ13 : <i>Psa</i> NZ45 | day 3                                                                  | day 7                  |
| 1 : 1                             | $(2.05 \pm 0.63)^{-2}$                                                 | $(2.28 \pm 0.7)^{-2}$  |
| 1 : 0.1                           | $(1.34 \pm 0.52)^{-2}$                                                 | $(3.14 \pm 2.3)^{-2}$  |
| 0.1 : 1                           | $(1.68 \pm 0.68)^{-2}$                                                 | $(1.88 \pm 0.81)^{-2}$ |

937

938 **Table S1. *In planta* transfer of *Psa*<sub>NZ45</sub>*ICE*\_cu from *Psa* NZ45 to *Psa* NZ13 at**  
 939 **different founding ratios of donor and recipient.** Donor and recipient strains  
 940 were dip-inoculated onto Hort16A leaves at different founding ratios and  
 941 frequency of recipients determined at days 3 and 7

| Primer name        | Sequence               |
|--------------------|------------------------|
| <i>copA for</i>    | ATCCGCGGTGACTCGATAAC   |
| <i>copA rev</i>    | CAGTCGATGGACCGTACTGG   |
| <i>enolase for</i> | GAGCTGACGTCCGACATAGAG  |
| <i>enolase rev</i> | CCAGTCCAACAGGTTTACCG   |
| <i>IntPsaNZ13</i>  | GTCAGGCTGATCACTTACGTTG |
| <i>IntPsaNZ45</i>  | GTCAGGCTGATCACTAGCGTTA |
| <i>att-1</i>       | TGTAGAATAGCGCGCCTCAG   |
| <i>att-2</i>       | AGCCGTAATCCTGCTGTCC    |

942

943 **Table S2. Primers used for *Psa*<sub>NZ13</sub>*ICE*\_eno and *Psa*<sub>NZ45</sub>*ICE*\_Cu detection and**  
 944 **integration loci.**

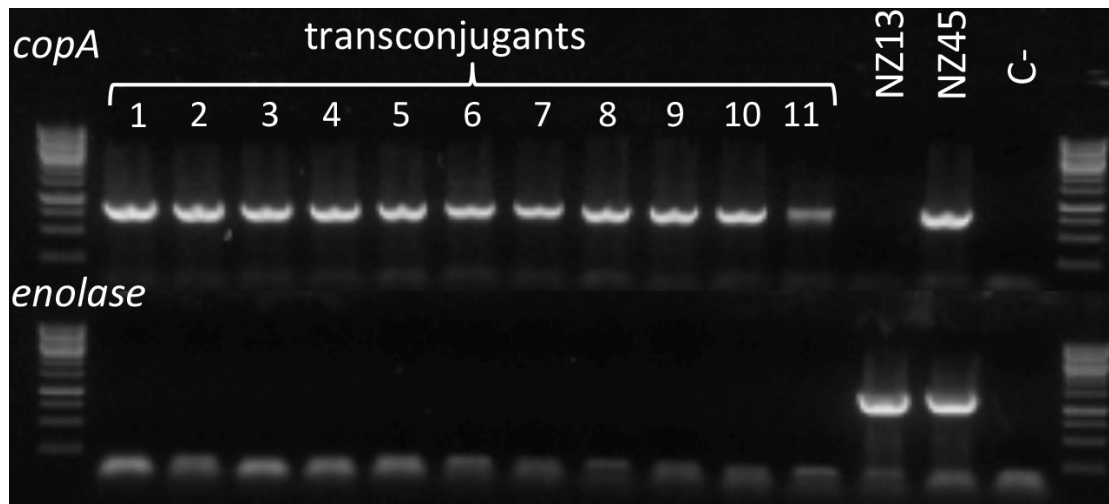

945

946

947 **Figure S6. Analysis of the presence of the variable region (VR) of**

948 ***Psa*<sub>NZ45</sub>ICE\_Cu and *Psa*<sub>NZ13</sub>ICE\_eno in 11 *Psa* NZ13 transconjugants.** PCRs

949 were carried out to detect *copA* (VR of *Psa*<sub>NZ45</sub>ICE\_Cu) or *enolase* genes (VR of

950 *Psa*<sub>NZ13</sub>ICE\_eno). Controls of *Psa* NZ13 and *Psa* NZ45 show one and two bands,

951 indicative of *Psa*<sub>NZ13</sub>ICE\_eno in *Psa* NZ13 and both *Psa*<sub>NZ13</sub>ICE\_eno *Psa*<sub>NZ45</sub>ICE\_Cu

952 and in *Psa* NZ45, respectively. All transconjugants, lanes 1-11 have acquired

953 *Psa*<sub>NZ45</sub>ICE\_Cu.

954

955

956

957

958

959

960

961

962

963

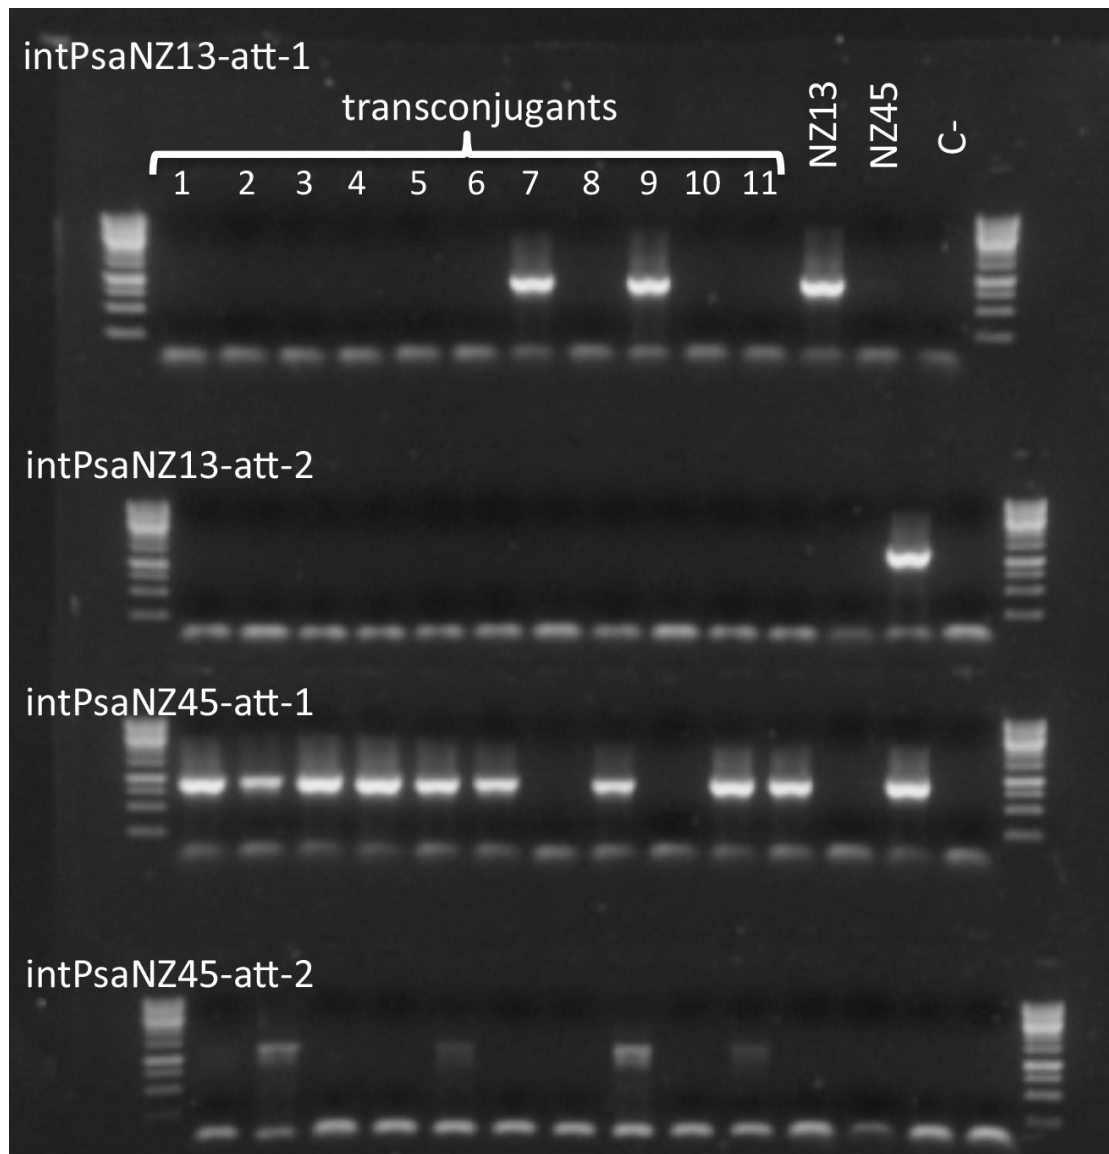

964

965 **Figure S7. Analysis of the insertion site of the *Psa*<sub>NZ13</sub>ICE\_eno and**  
966 ***Psa*<sub>NZ45</sub>ICE\_Cu in 11 *Psa* NZ13 transconjugants.** PCRs were to detect the  
967 integration of *Psa*<sub>NZ13</sub>ICE\_eno in the *att-1* or *att-2* sites (*intPsa*<sub>NZ13</sub>-*att-1* and  
968 *intPsa*<sub>NZ13</sub>-*att-2*) and the integration of *Psa*<sub>NZ45</sub>ICE\_Cu in the *att-1* or *att-2* sites  
969 (*intPsa*<sub>NZ45</sub>-*att-1* and *intPsa*<sub>NZ45</sub>-*att-2*). Controls of *Psa* NZ13 and *Psa* NZ45  
970 show that in *Psa* NZ13 the *Psa*<sub>NZ13</sub>ICE\_eno is integrated in the *att-1* site and in  
971 *Psa* NZ45 the *Psa*<sub>NZ13</sub>ICE\_eno is integrated in the *att-1* and the *Psa*<sub>NZ45</sub>ICE\_Cu in  
972 the *att-2* site.
